# Supplementary material for: A new-to-nature carboxylation module to improve natural and synthetic CO2 fixation
Source: Springer Nature journal article supplement (doi:10.1038/s41929-020-00557-y), 2021-01-04
Supplement: MOESM1 [file 41929_2020_557_MOESM1_ESM.pdf]

## **Supplementary information**

---

# **A new-to-nature carboxylation module to improve natural and synthetic CO<sub>2</sub> fixation**

---

In the format provided by the authors and unedited

# Supplementary Information

A new-to-nature carboxylation module to improve natural and synthetic CO<sub>2</sub> fixation

Marieke Scheffen, Daniel G. Marchal, Thomas Beneyton, Sandra K. Schuller, Melanie Klose, Christoph Diehl, Jessica Lehmann, Pascal Pfister, Martina Carrillo, Hai He, Selçuk Aslan, Niña S. Cortina, Peter Claus, Daniel Bollschweiler, Jean-Christophe Baret, Jan M. Schuller, Jan Zarzycki, Arren Bar-Even, Tobias J. Erb\*

\*Correspondence to: [toerb@mpi-marburg.mpg.de](mailto:toerb@mpi-marburg.mpg.de)

**This PDF file includes**

Supplementary Methods

Supplementary Figures 1 - 25

Supplementary Tables 1 – 8

Supplementary References

## Supplementary Methods

**Synthesis of CoA esters.** Glycolyl-CoA was synthesized as previously described<sup>1</sup>. Tartronyl-CoA was enzymatically synthesized using the malonyl-CoA synthetase MatB<sup>2</sup>. The preparation contained in a total volume of 10 mL 200 mM MOPS/KOH pH 7.8, 20 mM tartronate, 7.5 mM ATP, 10 mM MgCl<sub>2</sub>, 5 mM coenzyme A and 600 µg MatB. The reaction was performed for 18.5 h at room temperature, quenched with 1% HCl and centrifuged at  $17.000 \times g$  for 20 min. CoA esters were purified using preparative HPLC. The synthesis mixtures were applied to a preparative Agilent 1260 Infinity HPLC with a Gemini 10 µm NX-C18 110 Å column (Phenomenex). Chromatographic separation was achieved using 25 mM ammonium formate pH 4.2 with a methanol gradient from 1% to 30% at a flow rate of 25 mL min<sup>-1</sup>. Glycolyl-CoA or tartronyl-CoA fractions, respectively, were pooled, flash-frozen in liquid nitrogen, and lyophilized. The concentration of CoA-esters was quantified by determining the absorption at 260 nm ( $\epsilon=16.4 \text{ mM}^{-1} \text{ cm}^{-1}$ ).

**Cloning of expression vectors.** All *in silico* cloning was performed with Clone Manager 9 (Scientific & Educational Software). For purification, preparation, cloning, transformation and amplification of DNA, standard protocols were used<sup>3</sup>. Plasmid isolation and PCR-product purification was performed according to the manufacturer's protocols using the kits NucleoSpin® Plasmid (Macherey Nagel) and NucleoSpin® Gel and PCR Clean-up (Macherey Nagel). All primers used in this study were synthesized by Eurofins Genomics Germany GmbH. All primers used in this study can be found in Supplementary Table 6 and all plasmids are listed in Supplementary Table 7. The plasmids of propionate CoA transferase from *Clostridium propionicum* (pET-16b\_PCT) and *Ralstonia eutropha* (pET-19b::pct) were kind gifts from I. Berg, Münster (Germany) and A. Steinbüchel, Münster (Germany), respectively. The plasmid of the water-forming NADH oxidase from *Lactobacillus pentosus* (pET28a-NH-nox-L.p.) was a kind gift from V. Sieber, Straubing (Germany). The plasmid for the AMP-regenerating polyphosphate kinase (pET28a-AjPKK2) was a kind gift from J. Andexer, Freiburg (Germany). For the construction of the expression plasmid for 4-OH-butyrate CoA transferase (AbfT) from *Clostridium aminobutyricum* (pTE1138), the gene was ordered codon-optimized and cloned into a pET16b derivative using XbaI and KpnI for restriction. The genes encoding for *EryACS1* and *EryACS2* were synthesized codon-optimized for *E. coli* and cloned into the backbone pSEVA141 by the DOE Joint Genome Institute (JGI) (*ACS1*, pTE1007) or pSEVA261 (*ACS2*, pTE1008), respectively. For the construction of the expression vectors for the *ACS1* mutants *ACS1\_V379G* (pTE1434), *ACS1\_V379S* (pTE1418), *ACS1\_V379A*

(pTE1417) and ACS1\_V379A\_L641P (pTE1427), single-oligo directed mutagenesis was performed<sup>4</sup> using the primers ACS\_Ery\_V379G, ACS\_Ery\_V379S, ACS\_Ery\_V379A and ACS\_Ery\_L641P, respectively. The gene encoding for the ligase domain of the propionyl-CoA synthase (*EryPCS\_lig*) was synthesized by the JGI and subcloned into the vector pET16b, using NdeI and BamHI restriction sites, resulting in plasmid pJZ26. The genes encoding for the two subunits of propionyl-CoA carboxylases from *Chloroflexus aurantiacus* (*CaPCC1* and *CaPCC2*) were synthesized by the JGI and subcloned as dicistrons into the vector pT7-7<sup>5</sup>, using NdeI and BamHI restriction sites, resulting in plasmids pJZ95 and pJZ96. The genes encoding for the two subunits of propionyl-CoA carboxylases from *Erythrobacter sp.* NAP1 (*EryPCC*) were synthesized by the JGI and subcloned into the vector pCDFDuet-1 (Novagen, Merck), using NcoI/HindIII and NdeI/XhoI restriction sites, resulting in plasmid pJZ151. For the expression of PCC from *Methylobacterium extorquens* AM1, plasmid pTE615 was used<sup>6</sup>. The PCC plasmids containing the PCC mutants PCC\_LD (pJZ99), PCC\_LN (pJZ100), PCC\_YE (pJZ101), PCC\_YH (pJZ141), PCC\_YQ (pJZ102), PCC\_GA (pJZ127), PCC\_GS (pJZ117), PCC\_GT (pJZ118), PCC\_DI (pJZ105) and PCC\_DK (pJZ103), were obtained by performing single-oligo directed mutagenesis<sup>4</sup> using the primers PCCtoGCC\_L140D, PCCtoGCC\_L140N, PCCtoGCC\_Y143E, PCC\_Y143H, PCCtoGCC\_Y143Q, PCC\_G170A, PCC\_G170S, PCC\_G170T, PCCtoACC\_D407I and PCCtoGCC\_D407K, respectively, using pTE615 as a template (Supplementary Table 8). The plasmid for GCC M2 (pJZ133) was obtained by performing single-oligo mutagenesis<sup>4</sup> on pJZ105 using the primer PCC\_Y143H. The plasmids containing GCC\_M2\_LD (pTE1411), GCC\_M2\_LN (pTE1413) and GCC M3 (pTE1412) were created by single-oligo mutagenesis<sup>4</sup> using pJZ133 as a template and PCC\_L100D, PCC\_L100N, PCC\_L100S as primers, respectively (Supplementary Table 7). The plasmids pTE1422 and pTE1425 were created by performing single-oligo mutagenesis<sup>4</sup> on pTE1412 using the primers PCCMe\_D171A and PCCMe\_D171V, respectively (Supplementary Table 6, Supplementary Table 7). The plasmid for GCC M4 was obtained from isolation after screening the random mutagenesis library of pTE1412 and was termed pTE3100. The plasmid for GCC M5 was obtained from isolation after screening the random mutagenesis library of pTE3100 and was termed pTE3101. The gene of malonyl-CoA reductase from *Erythrobacter sp.* NAP1 was synthesized codon-optimized for *E. coli* by JGI and obtained subcloned into pSEVA 321 (pTE1010). The *birA* gene from *M. extorquens* AM1 was amplified from isolated genomic DNA, via flanking primers including restrictions sites for NdeI (BirA\_Me\_bb\_for) and BamHI (BirA\_Me\_bb\_rev, Supplementary Table 6). The PCR product was inserted into the expression vector pET16b via restriction digestion by the respective

enzymes and ligation. Single-oligo directed mutagenesis<sup>4</sup> was used to remove an EcoRI site from the construct. The Polyhistidin-tag, flanked with NdeI and NcoI sites, was removed by mutating the NcoI site to NdeI by site directed mutagenesis and restriction digestion with NdeI and religation of the construct. The plasmids pCA24N-adk, pCA24N-eno, pCA24N-fucO, pCA24N-glxK, pCA24N-gph and pCA24N-gpmI were obtained from the ASKA collection<sup>7</sup>. The gene gox0313 was ordered readily cloned in the vector pET16b (BaseClear B.V.), using NdeI and BamHI restriction sites (pTE1453). For the construction of pTE1125, the insert of pBBR1p264-gox1801-ST<sup>8</sup> (which was a kind gift of U. Deppenmeier, Bonn (Germany)) was PCR amplified using the primers MC60 and MC61 (Supplementary Table 6) and cloned into a pET16b derivative using NdeI and KpnI restriction sites. To obtain the expression plasmid for CdSucD (pTE1816), the gene was synthesized codon-optimized (Eurofins Genomics Germany GmbH) and cloned into pTE380<sup>6</sup> using NcoI and SalI restriction sites. Plasmids for the expression of all CETCH-enzymes were as described earlier<sup>6</sup>.

**Bacterial strains.** For cloning purposes, *E. coli* DH5 $\alpha$  (Thermo Fisher Scientific) was used. For transformation of the megaWHOP products (see library generation), *E. coli* ElectroMAX DH5 $\alpha$  (Thermo Fisher Scientific) were used. For expression of recombinant proteins *E. coli* BL21 (DE3), *E. coli* BL21-AI (Thermo Fisher Scientific) or *E. coli* Rosetta (DE3) pLysS (Novagen Merck) were used. For the expression of biotin-dependent carboxylases, *E. coli* BL21 (DE3) containing the pJZ152 plasmid (encoding for *M. extorquens* biotin ligase) was used (BL21\_BirA). For the expression of Nmar0206 we used *E. coli* BL21\_GroES/GroEL<sup>6</sup>. For the heterologous expression of acyl-CoA synthetases, an *E. coli* BL21 (DE3) AI  $\Delta$ patZ strain was constructed by using the Quick & Easy *E. coli* Gene Deletion Kit (Gene Bridges GmbH) following the manufacturer's instructions. In brief, in a first step a PCR product from the functional cassette including a kanamycin resistance gene and flanking homology arms was generated using the primers patZ\_KO\_fw and patZ\_KO\_rv (Supplementary Table 6). In the next step, the pRedET plasmid containing the recombination genes and a temperature-sensitive origin of replication was transformed into *E. coli* BL21 AI (DE3). To start the recombination process, the expression of the Red/ET recombination genes was induced and the linear PCR product transformed into the cells. To confirm the integration of the Kan-cassette and knock-out of *patZ* in the genome of BL21-AI, single colonies were picked and analyzed by colony PCR using the primers patZ\_KO\_P1 and patZ\_KO\_P4 (Supplementary Table 6).

**Heterologous expression and purification of recombinant proteins.** For the overexpression of recombinant proteins, the corresponding plasmids (Supplementary Table 7) were transformed into chemically competent *E. coli* cells. See Supplementary Table 8 for details on the expression strain. The cells were grown on LB agar plates containing the selective antibiotics (Supplementary Table 8) at 37 °C overnight. Typically, 1 L selective medium was inoculated with the colonies obtained from the overnight culture and grown at 37 °C to an OD<sub>600</sub> of 0.4 to 1.0, induced with IPTG (and arabinose in the case of ACSs) and grown overnight at 21 °C or 25 °C (Supplementary Table 8). Cells were harvested at 6000 × *g* for 12 min at 4 °C and cell pellets were stored at -80 °C until purification of enzymes. Nmar0206 and Nmar0207 were expressed as described earlier<sup>6</sup>. Proteins were purified as described in the following (Supplementary Table 8).

**Purification protocol a:** Cell pellets were resuspended in two-fold volume of buffer A<sub>His</sub> (50 mM HEPES, 500 mM NaCl, pH 7.8) containing 0.1 mg mL<sup>-1</sup> DNase I. The cell suspension was passed through a French pressure cell twice at a pressure of 137 MPa and centrifuged at 100,000 × *g* and 4 °C for 1 h. The supernatant was filtered through a 0.45 μm syringe filter and loaded at a flow rate of 1 mL min<sup>-1</sup> onto a 1 mL HisTrap™ FF column (GE Healthcare) which had previously been equilibrated with 5 column volumes of buffer A<sub>His</sub>. The column was washed with 20 column volumes of 90% buffer A<sub>His</sub> and 10% buffer B<sub>His</sub> (50 mM Tris/HCl, 500 mM NaCl, 500 mM imidazole, pH 7.8) and the protein was eluted with buffer B<sub>His</sub>. The fraction containing the eluted enzyme was desalted using 5 mL HiTrap™ Desalting columns (GE Healthcare) and buffer A<sub>Strep</sub> (50 mM HEPES, 150 mM NaCl, pH 7.8).

**Purification protocol b:** Cell pellets were resuspended in two-fold volume lysis buffer (20 mM Tris-HCl pH 7.5, 500 mM NaCl, 10% glycerol). Resuspended cells were stored at -20 °C until lysis. Cells were lysed by ultrasonication and the lysate was cleared by ultracentrifugation at 50,000 × *g* for 45 min at 4 °C and subsequently filtered through a 0.45 μm filter. The cleared lysate was loaded onto a 1 mL HisTrap™ FF column (GE Healthcare) and unbound protein was removed with 20 mL of 20 mM Tris-HCl pH 7.5, 500 mM NaCl, 75 mM imidazole. The protein was eluted in 20 mM Tris-HCl pH 7.5, 500 mM NaCl and 500 mM imidazole. The protein from elution fractions was desalted with a HiTrap™ Desalting column (GE Healthcare) in 20 mM Tris-HCl pH 7.5, 200 mM NaCl.

**Purification protocol c:** Cell pellets were resuspended in two-fold volume of buffer A<sub>Strep</sub> (50 mM HEPES, 150 mM NaCl, pH 7.8) containing 0.1 mg mL<sup>-1</sup> DNase I. The cell suspension was passed through a French pressure cell twice at a pressure of 137 MPa and centrifuged at 100,000 × *g* and 4 °C for 1 h. The supernatant was filtered through a 0.45 μm syringe filter and

loaded at a flow rate of 1 mL min<sup>-1</sup> onto a 1 mL StrepTrap™ HP column (GE Healthcare) which had previously been equilibrated with 5 column volumes of buffer A<sub>Strep</sub>. The column was washed with 20 column volumes of buffer A<sub>Strep</sub> and the protein was eluted with buffer A<sub>Strep</sub> containing 3 mM desthiobiotin.

**Purification protocol d:** Cell pellets were resuspended in two-fold volume lysis buffer (50 mM Tris-HCl pH 7.5, 150 mM NaCl, 10% glycerol). Resuspended cells were stored at -20 °C until lysis. Cells were lysed by ultrasonication and the lysate was cleared by ultracentrifugation at 50,000 × g for 45 min at 4 °C and subsequently filtered through a 0.45 µm filter. The cleared lysate was loaded onto a 1 mL StrepTrap HP (GE Healthcare) and unbound protein was removed with 20 mL of 50 mM Tris-HCl pH 7.5, 150 mM NaCl. The protein was eluted in 50 mM Tris-HCl pH 7.5, 150 mM NaCl and 2.5 mM of desthiobiotin.

**Purification protocol e:** Cells were resuspended in two-fold volume of lysis buffer (500 mM NaCl, 50 mM HEPES, 10% glycerol, pH 7.8) containing 5 mM MgCl<sub>2</sub>, 10 µg ml<sup>-1</sup> DNase and one tablet of SigmaFAST Protease Inhibitor Cocktail (Sigma-Aldrich). The cells were lysed by microfluidization (two times at 16,000 psi). The cell lysate was centrifuged at 50,000 × g for 1 h at 4 °C. The supernatant was filtered through a 0.45 µm filter. The lysate was mixed with 3 ml Protino Ni-NTA agarose beads (Macherey-Nagel) and incubated on ice for 30-45 min (70 rpm). Afterwards the beads were collected in a gravity column and washed with three column volumes (cv) of lysis buffer. For the removal of unspecific bound proteins the beads were washed with three cv of lysis buffer containing 50 mM imidazole and three cv with lysis buffer containing 75 mM imidazole. The enzymes were eluted in two cv of lysis buffer containing 500 mM imidazole. The collected recombinant protein was concentrated in Amicon Ultra 15 mL Centrifugal Filters (Merck). For desalting, the protein solution was loaded on a HiLoad 16/600 Superdex 200 pg column (GE Healthcare). The desalting/storage buffer contained 200 mM NaCl, 50 mM HEPES and 10% glycerol. For Hbs and Hbd, the buffer contained 500 mM NaCl.

**Purification protocol f:** Cell pellets were resuspended in two-fold volume of lysis buffer (200 mM MOPS, 100 mM NaCl, pH 7.8) containing 0.1 mg mL<sup>-1</sup> DNase I. The cell suspension was passed through a French pressure cell at 137 MPa. The lysate was heat precipitated at 65 °C for 10 min and then cooled on ice and centrifuged at 100,000 × g and 4 °C for 1 h. The supernatant was filtered through a 0.45 µm syringe filter and used for enzyme assays.

All enzymes were concentrated with Amicon Ultra centrifugal filters (Merck Millipore) with appropriate size cut-offs and concentration was determined using a Nanodrop 2000 spectrophotometer (Thermo Scientific). Enzymes were stored in 20 - 50% glycerol in the

corresponding purification buffer at -20 °C or -80 °C. The storage buffer for Pco and Mco additionally contained FAD (1 μM per μM of enzyme). The storage buffer of Mcm and Ecm additionally contained 2 mM Coenzyme B<sub>12</sub>. The storage buffer of Nmar0206 additionally contained 2 mM MgCl<sub>2</sub>. The purity of enzymes was assessed using SDS polyacrylamide gel electrophoresis.

**Activity assay of CoA-transferases.** Specific activities of acyl-CoA:propionate transferases (*RePCT* and *CpPCT*) and 4-OH-butyrate CoA transferase (*AbfT*) were determined via analysis of the time-dependent formation of glycolyl-CoA using ultra-high performance liquid chromatography coupled high resolution mass spectrometry (UPLC-hrMS). The enzyme assay was performed at 37 °C in a total volume of 60 μL. The reaction mixture contained 200 mM MOPS/KOH pH 7.5, 2 mM acetyl-CoA, 100 μg enzyme and 10 mM to 800 mM glycolate. Aliquots were taken at time points 0.5, 1.0, 1.5 and 2.0 minutes and the reaction was immediately stopped by HCl (1% total concentration). The samples were centrifuged at 17,000 × g at 4 °C and the supernatant used for UPLC-hrMS analysis.

**Activity assay of acyl-CoA synthetases.** To determine specific activities of acyl-CoA synthetases, a coupled spectrophotometric assay to measure AMP formation was used. The ATP hydrolysis reaction was measured coupled to ADP regeneration by myokinase and ATP regeneration by pyruvate kinase (PK) with phosphoenolpyruvate (PEP) and subsequent reduction of pyruvate to lactate by lactic dehydrogenase (LDH). The oxidation of NADH by LDH was followed spectrophotometrically at 340 nm. The assay was performed at 30 °C and typically contained 100 mM MOPS/KOH (pH 7.8), 5 mM MgCl<sub>2</sub>, 2.5 mM ATP, 15 U mL<sup>-1</sup> pyruvate kinase, 23 U mL<sup>-1</sup> lactic dehydrogenase, 2.5 mM PEP, 200 μg mL<sup>-1</sup> myokinase, 1 mM coenzyme A, 0.4 mM NADH, 2 μg mL<sup>-1</sup> ACS/GCS and 1 - 200 mM glycolate.

**Activity assay of carboxylases.** Activity of glycolyl-CoA carboxylase (GCC) was determined spectrophotometrically at 37 °C in three different ways.

The ATP hydrolysis reaction was measured coupled to ATP regeneration by pyruvate kinase (PK) with phosphoenolpyruvate (PEP) and subsequent reduction of pyruvate to lactate by lactic dehydrogenase (LDH). The oxidation of NADH by LDH was followed spectrophotometrically at 340 nm. The reaction mixture (200 μL) typically contained 100 mM MOPS/KOH pH 7.8, 5 mM ATP, 50 mM KHCO<sub>3</sub>, 2.5 mM phosphoenolpyruvate, 15 U mL<sup>-1</sup> pyruvate kinase,



23 U mL<sup>-1</sup> lactic dehydrogenase, 0.4 mM NADH, 7.5 mM MgCl<sub>2</sub>, 2 mM glycolyl-CoA and 40 µg mL<sup>-1</sup> GCC.

To measure carboxylation activity, spectrophotometric assays at 365 nm were performed coupling the product formation (tartronyl-CoA) to its subsequent reduction via tartronic semialdehyde to glycerate by use of tartronyl-CoA reductase (TCR). This coupling reaction was analogous to an activity assay for acetyl-CoA carboxylase<sup>9</sup>. The reaction mixture (200 µL) typically contained 100 mM MOPS/KOH pH 7.8, 1.7 mg mL<sup>-1</sup> TCR, 50 mM KHCO<sub>3</sub>, 0.6 mM NADPH, 5 mM MgCl<sub>2</sub>, 100 µg mL<sup>-1</sup> GCC, 0.8 - 2 mM glycolyl-CoA and 0.8 - 5 mM ATP. For determination of the ratio of ATP hydrolysis to carboxylation, the TCR-coupled assay was used under ATP-limiting conditions (0.8 mM) and the ratio of ATP-hydrolysis to carboxylation was calculated from the delta absorption values.

For determination of kinetic parameters of GCC variants, we analyzed the time-dependent formation of tartronyl-CoA using ultra-high performance liquid chromatography coupled high resolution mass spectrometry (UPLC-hrMS). The assays contained 100 mM MOPS/KOH pH 7.8, 50 mM KHCO<sub>3</sub>, 6 mM MgCl<sub>2</sub>, 3 mM ATP, 0.03 - 0.3 mg mL<sup>-1</sup> GCC and 0.1 - 1.6 mM glycolyl-CoA. Aliquot samples were withdrawn, quenched with 1% HCl, centrifuged at 17,000 × g for 20 min at 4 °C and analyzed by UPLC-hrMS.

**Activity assay of acyl-CoA reductases.** The kinetics of tartronyl-CoA reduction of *Ca*MCR (TCR) and *Ery*MCR were determined spectrophotometrically at 365 nm following the oxidation of NADPH. Per molecule tartronyl-CoA, two molecules of NADPH are oxidized by MCR, which was taken into account for the calculation of specific activities. The measurements were carried out at 37 °C in 100 mM MOPS/KOH pH 7.5, 5 mM MgCl<sub>2</sub>, 0.4 mM NADPH, 115 µg mL<sup>-1</sup> *Ca*MCR or 88 µg mL<sup>-1</sup> *Ery*MCR and 0.01 - 2 mM tartronyl-CoA.

**Activity assay of dehydrogenases.** The specific activities of FucO and Gox0313 with ethylene glycol were determined spectrophotometrically at 37 °C and 340 nm. The assay contained 100 mM MOPS/KOH pH 7.8, 155 µg mL<sup>-1</sup> FucO or 35 µg mL<sup>-1</sup> Gox0313, 2 mM NAD<sup>+</sup> and 10 - 2000 mM ethylene glycol. The specific activity of PduP with glycol aldehyde was measured spectrophotometrically at 37 °C and 340 nm and the assay contained 100 mM MOPS/KOH pH 7.8, 11 µg mL<sup>-1</sup> PduP, 0.5 mM CoA, 1 mM NAD<sup>+</sup> and 50 mM glycolaldehyde dimer.

**Activity assay of 2-phosphoglycolate phosphatase.** Phosphoglycolate phosphatase (Pgp) was assayed in 100 mM MOPS/KOH pH 7.8, 5 mM MgCl<sub>2</sub> and 2 mM 2-phosphoglycolate with 7 μg mL<sup>-1</sup> Pgp at 37 °C. Aliquot samples were taken at time points 0 min, 1 min and 10 min and quenched with HCl (1% end concentration). The samples were analyzed using the Phosphate colorimetric kit (Sigma-Aldrich) following the manufacturer's instructions and the specific activity was calculated from the enzyme- and time-dependent release of P<sub>i</sub>.

**Activity assay of glycerate kinase.** The activity of glycerate kinase (GlxK) was measured spectrophotometrically at 340 nm and 37 °C. The assay contained 100 mM MOPS/KOH pH 7.8, 1 mM ATP, 5 mM MgCl<sub>2</sub>, 0.4 mM NADH, 2.5 mM phosphoenolpyruvate, 0.5 mM glycerate, 15 U mL<sup>-1</sup> pyruvate kinase, 23 U mL<sup>-1</sup> lactate dehydrogenase and 4 μg mL<sup>-1</sup> GlxK.

**Activity assay of phosphoglycerate mutase.** Activity of phosphoglycerate mutase (Gpm) was measured spectrophotometrically at 340 nm and 37 °C. The assay contained 100 mM MOPS/KOH pH 7.8, 1 mM ADP, 5 mM MgCl<sub>2</sub>, 0.4 mM NADH, 66 μg mL<sup>-1</sup> enolase, 15 U mL<sup>-1</sup> pyruvate kinase, 23 U mL<sup>-1</sup> lactate dehydrogenase, 1 mM 3-phosphoglycerate and 5 μg mL<sup>-1</sup> Gpm.

**Activity assays of enzymes of the CETCH cycle.** Activities of all enzymes of the CETCH cycle were measured as described previously <sup>6</sup>.

**Michaelis-Menten kinetics.** Michaelis-Menten kinetics were typically calculated from 18 independent activity measurements (six different substrate concentrations in triplicates) using non-linear regression analysis in GraphPad Prism 8.0.

**Avidin gel shift assay.** To confirm full biotinylation of biotin-dependent carboxylases, we performed avidin gel shift assays as described previously for streptavidin<sup>10</sup>. In brief, 10 μM of carboxylase was mixed with non-reducing SDS-PAGE buffer (final concentrations 2% SDS, 10% glycerol, 60 mM Tris-HCl pH 6.8) and incubated for 5 min at 100 °C. 10 μM of avidin (Santa Cruz Biotechnology) in PBS was added and loaded onto a gradient SDS gel (Mini-PROTEAN® TGX™ 4-20%, Bio-Rad) after 5 min incubation at RT. The gel was run for 90 min at 100 V in Rotiphorese® SDS-PAGE buffer (Roth) and stained afterwards with GelCode™ Blue Safe Protein Stain (Thermo Scientific).

**Circular dichroism (CD) spectroscopy.** Protein denaturation curves were obtained by monitoring the ellipticity at 218.5 nm using a Jasco-J-815 CD spectropolarimeter equipped with a Jasco PTC-423S temperature controller. 0.3 mg ml<sup>-1</sup> purified protein was loaded in a 1mm Quartz Suprasil (Helma) cuvette with 15 mM HEPES at pH 7.8 and 45 mM KCl. A bandwidth of 3.41 nm and D.I.T of 2 s was used with a heating rate of 1 °C min<sup>-1</sup> in a temperature range of 20 - 80 °C. CD spectra of each protein were measured from 205 - 250 nm at 20 °C with a scanning speed of 100 nm min<sup>-1</sup>. T<sub>m</sub> determination was done using the Jasco Spectra Manager 2.06 software.

**Microfluidic device fabrication.** Microfluidic chips were prepared from poly-(dimethylsiloxane) (PDMS, Sylgard 184) from SU8-3000 negative photoresist (MicroChem Corp) molds produced using standard soft-lithography procedures<sup>11</sup>. The surfaces of the microfluidic channels were treated with fluoro-silane (Aquapel, Aquapel) before use.

**Microfluidic device operation.** All the microfluidic workflows (devices and flow rates) for performing short-term or long-term multiplexed kinetics were as previously described<sup>12</sup>. The microfluidic devices were placed and held on an inverted microscope (IX71, Olympus) and connected to either Nemesys syringe pumps (Cetoni) or a pressure driven pump (Fluigent, MFCS-4C) via PTFE tubing (Fisher Scientific; inner diameter (ID) of 0.3 mm; outer diameter (OD) of 0.76 mm) to control the flow in the microfluidic devices. Droplets were produced in fluorinated oil (Novec7500, 3M) and stabilized against coalescence by a perfluoropolyether-polyethyleneglycol block-copolymer surfactant (PFPE-PEG-PFPE), synthesized as previously described<sup>13</sup>. The optical set up for fluorescence detection was similar to that reported previously<sup>12</sup>. Data acquisition (DAQ) and control were performed by a DAQ card (National Instruments) executing a program written in LabVIEW (National Instruments). The data acquisition rate for the system was 200 kHz.

**Microfluidic assays with purified GCC.** To establish a microfluidic assay to screen for better GCC variants, the coupled spectrophotometric assay of GCC with TCR to monitor carboxylation activity was transferred into water-in-oil (w/o) droplets with purified GCC using a short-term multiplexed kinetics workflow<sup>12</sup>. Substrate solutions containing all substrates except for glycolyl-CoA and the purified GCC were encapsulated in 30 pL w/o droplets and a glycolyl-CoA solution was injected into these droplets to start the reaction. The final concentrations in the droplets were 100 mM MOPS/KOH pH 7.8, 1 - 5 mM ATP, 2.5 - 7.5 mM

MgCl<sub>2</sub>, 1 mM NADPH, 50 mM KHCO<sub>3</sub>, 1 mM glycolyl-CoA, 80 µg mL<sup>-1</sup> GCC, 400 µg mL<sup>-1</sup> CaMCR and 30, 60, 90 or 120 µM sulforhodamine B.

**Microfluidic assays with single encapsulated *E. coli* cells.** For single-cell microfluidic encapsulation, *E. coli* BL21 (DE3) cells were freshly transformed with PCC, GCC M3 or the randomized libraries 1\_1, 1\_2 and 1\_3, and grown on selective agar plates overnight. 25 mL of selective LB medium was inoculated to an OD<sub>600nm</sub> of approx. 0.1 and the cells were grown to an OD<sub>600nm</sub> of 0.4 to 0.6. Protein expression was induced by the addition of 0.2 mM IPTG. The cells were grown for 3 h or overnight, subsequently harvested by centrifugation (10 min at 2500 × g) and washed three times with 100 mM MOPS/KOH pH 7.8. In the case of experiments with GCC libraries, the library expressing cells were pooled before centrifugation. After determination of OD<sub>600nm</sub> the cells were diluted to a final in-droplet OD<sub>600nm</sub> of 0.05 to achieve a droplet occupancy by cells of 5% to 10%, assuring that droplets containing cells only contain a single cell. Sulforhodamine B was added at varying concentrations (10 µM to 150 µM) to the solutions. A separate substrate and cell lysis solution was prepared containing (final in-droplet concentration) 100 mM MOPS/KOH pH 7.8, 0 - 5 mM ATP, 5 - 10 mM MgCl<sub>2</sub>, 1 mM NADPH, 50 mM KHCO<sub>3</sub>, 0.1 × CellLytic B (Sigma Aldrich), 1 mM glycolyl-CoA and 400 µg mL<sup>-1</sup> CaMCR. The conditions for cell lysis were as described previously<sup>14</sup>. Cells were encapsulated in 30 pL droplets, incubated at 37 °C and reinjected for analysis over time using a long-term multiplexed kinetics workflow<sup>12</sup>.

**Mass spectrometry of CoA esters (UPLC-hrMS).** The measurements of CoA esters were done using an Agilent 6550 iFunnel Q-TOF LC-MS system equipped with an electrospray ionization source set to positive ionization mode.

Compounds were separated on an RP C18 column (50 mm x 2.1 mm, particle size 1.7 µm, Kinetex EVO C18, Phenomenex) using a mobile phase system comprised of 50 mM ammonium formate pH 8.1 (A) and methanol (B). Chromatographic separation was carried out using the following gradient condition at a flow rate of 250 µL min<sup>-1</sup>: 0 min 2.5% B; 1 min 2.5% B, 6 min 95% B; 6.25 min 95% B; 6.35 min 2.5% B; 7 min 2.5% B. Capillary voltage was set at 3.5 kV and nitrogen gas was used for nebulizing (20 psig), drying (13 L min<sup>-1</sup>, 225 °C) and sheath gas (12 L min<sup>-1</sup>, 400 °C). The TOF was calibrated using an ESI-L Low Concentration Tuning Mix (Agilent) before measurement (residuals less than 2 ppm for five reference ions) and was recalibrated during a run using 922 *m/z* as reference mass. MS data

were acquired with a scan range of 500 - 1200  $m/z$ . LC-MS data were analyzed using MassHunter Qualitative Analysis and TOF Quantitative Analysis (Agilent).

**Mass spectrometry of organic acids.** Glycerate and malate were derivatized according to a method described earlier<sup>15</sup>. In brief, 10  $\mu\text{L}$  of sample was mixed with 10  $\mu\text{L}$  150 mM 1-(3-Dimethylaminopropyl)-3-ethylcarbodiimide (EDC), 10  $\mu\text{L}$  250 mM 3-nitrophenylhydrazine (3-NPH), and 10  $\mu\text{L}$  of 7.5% pyridine in methanol in a 1.5 mL reaction tube. The reaction was incubated at 30 °C for 30 min. After incubation, the samples were centrifuged at 13,000  $\times g$  for 1 min and the supernatant was transferred into HPLC vials. UPLC-MS/MS analyses were performed on an Agilent 6495B Triple Quad LC/MS system equipped with an electrospray ionization source.

The analytes were separated on an RP-18 column (50 mm  $\times$  2.1 mm, particle size 1.8  $\mu\text{m}$ , Kinetex EVO C18, Phenomenex) kept at 40 °C using a mobile phase system comprised of 0.1% formic acid in water (A) and acetonitrile (B). The gradient was as follows: 0 min 5% B; 1 min 5% B, 6 min 95% B; 6.5 min 95% B; 7 min 5% B at a flow rate of 250  $\mu\text{L min}^{-1}$ . Samples were held at 15 °C and injection volume was 5  $\mu\text{L}$ . MS/MS data were acquired in negative MRM mode. Capillary voltage was set at 3 kV and nitrogen gas was used as nebulizing (25 psig), drying (11 L  $\text{min}^{-1}$ , 130 °C) and sheath gas (12 L  $\text{min}^{-1}$ , 400 °C). The dwell time and fragmentor voltage were 20 ms and 380 V, respectively. Optimized collision energy used for the 3-NPH derivatized-glycerate (240  $m/z \rightarrow 137 m/z$ ) and malate (403  $m/z \rightarrow 137 m/z$ ) was 22 V and 40 V respectively. LC-MS data were analyzed and quantified using MassHunter Qualitative Navigator and QQQ Quantitative Analysis software (Agilent).

**Mass spectrometry of phosphoglycerate.** Phosphoglycerate was measured using UPLC-high resolution MS. The analysis was performed using an Agilent 6550 iFunnel Q-TOF LC-MS system equipped with an electrospray ionization source set to negative ionization mode. Compounds were separated on a Phenomenex Luna  $\text{NH}_2$  (30 mm  $\times$  2 mm, particle size 3  $\mu\text{m}$ , 100 Å) and eluted by a binary gradient mobile phase system comprised of 20 mM ammonium acetate pH 9.3/acetonitrile 95:5 (solvent A) and acetonitrile (solvent B). Chromatographic separation was carried out using the following gradient condition at a flow rate of 250  $\mu\text{L min}^{-1}$ : 0 min 85% B; 3.5 min 0% B, 7 min 0% B; 7.5 min 85% B; 8 min 85% B. The column oven and autosampler were maintained at 10 °C. Injection volume was set to 1  $\mu\text{L}$ . The ESI-MS was operated with the following parameters: Capillary voltage: 3.5 kV, Nebulizer: 20 psig, drying gas ( $\text{N}_2$ ): 13 L  $\text{min}^{-1}$  at 225 °C, sheath gas ( $\text{N}_2$ ): 12 L  $\text{min}^{-1}$  at 400 °C). The QTOF mass detector

was calibrated prior to measurement using an ESI-L Low Concentration Tuning Mix (Agilent) with residuals and corrected residuals less than 2 ppm and 1 ppm respectively. MS data were acquired with a scan range of 50 - 600  $m/z$  and peaks were analyzed and integrated using the Agilent MassHunter Qualitative Analysis software.

**Optimization of ATP regeneration for *in vitro* reconstruction of the TaCo pathway.** For the optimization of ATP regeneration for *in vitro* reconstruction of the TaCo pathway, we tested different systems, including two types of polyphosphate kinase (PPK2-I from *Sinorhizobium meliloti* for regeneration of ATP from ADP and polyphosphate, and PPK2-II from *Acinetobacter johnsonii* for regeneration of ADP from AMP and polyphosphate)<sup>16</sup>, myokinase and creatine phosphokinase (CPK). The assays contained 100 mM MOPS/KOH pH 7.8, 5 mM ATP, 10 mM MgCl<sub>2</sub>, 2 mM coenzyme A, 2 mM NADPH, 50 mM KHCO<sub>3</sub>, 1 mM glycolate, 150  $\mu\text{g mL}^{-1}$  GCS, 608  $\mu\text{g mL}^{-1}$  GCC and 1120  $\mu\text{g mL}^{-1}$  TCR. Additionally, the assays contained 20 - 500 mM phosphocreatine (CP), 6.7 U mL<sup>-1</sup> creatine phosphokinase (CPK), 20 mM polyphosphate (PP), 33  $\mu\text{g mL}^{-1}$  polyphosphate kinase 2-I (PPK2-I) in combination with 133  $\mu\text{g mL}^{-1}$  polyphosphate kinase 2-II (PPK2-II) or 67  $\mu\text{g mL}^{-1}$  myokinase (and variations thereof). The assay was started with the addition of ATP, samples were withdrawn at different time points and immediately quenched with 1% HCl. The samples were centrifuged at 17,000  $\times g$  for 20 min at 4 °C and analyzed via UPLC-MS/MS for glycerate using the derivatization method (see below).

**Spectrophotometric assay of the TaCo pathway.** The initial assay contained 100 mM MOPS/KOH pH 7.8, 10 mM MgCl<sub>2</sub>, 0.4 mM NADPH, 50 mM KHCO<sub>3</sub>, 0.15 mg mL<sup>-1</sup> GCS, 0.56 mg mL<sup>-1</sup> GCC M4 and 1.1 mg mL<sup>-1</sup> TCR. Then, first 20 mM glycolate were added, then 1 mM coenzyme A and the assay was then started with the addition of 5 mM ATP. The decrease in NADPH absorption at 340 nm was followed spectrophotometrically.

***In vitro* reconstruction of the TaCo pathway from 2-PG.** For the reconstruction of the TaCo pathway starting from 2-phosphoglycolate (2-PG), assays were run at 37 °C. The assays initially contained 100 mM MOPS/KOH pH 7.8, 10 mM MgCl<sub>2</sub>, 2 mM NADPH, 50 mM NaH<sup>13</sup>CO<sub>3</sub>, 2 mM coenzyme A, 200 mM phosphocreatine, 20 mM polyphosphate, 10 mM glucose-6-phosphate, 4.8 U mL<sup>-1</sup> G6PDH, 0.19 mg mL<sup>-1</sup> PPKII-2, 4.8 U mL<sup>-1</sup> creatine kinase, 0.03 mg mL<sup>-1</sup> Pgp, 0.58 mg mL<sup>-1</sup> GlxK, 0.46 mg mL<sup>-1</sup> GCS, 0.69 mg mL<sup>-1</sup> GCC M4 and 1.07 mg mL<sup>-1</sup> TCR. The assay was started with the addition of 2.5 mM phosphoglycolate and

5 mM ATP, samples were withdrawn at different time points and immediately quenched with 1% HCl. The samples were centrifuged at  $17,000 \times g$  for 20 min at 4 °C and analyzed via UPLC-MS/MS for 2-PGA.

## Supplementary Figures

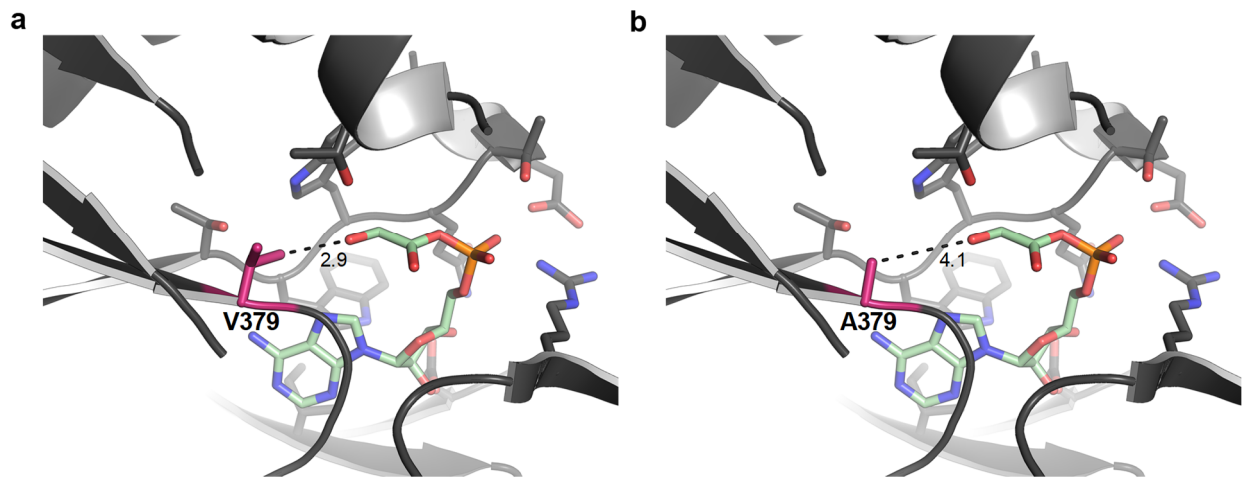

**Supplementary Figure 1. Active site homology model for acetyl-CoA synthetase 1 of *Erythrobacter* sp. NAPI.** The homology model is based on the crystal structure of an acetyl-CoA synthetase from *S. enterica* (PDB 2P2B). The residue targeted for mutagenesis is shown in pink. The reaction intermediate glycolyl-AMP was modelled into the active site based on the position of an adenosine-5'-monophosphate-propyl ester (mimicking the acetyl-AMP reaction intermediate of *S. enterica* ACS) bound in PDB 2P2B. Distances are given in Å. **(a)** In the wild type *EryACS1*, the hydroxyl group of the glycolyl moiety would be in an unfavorable close contact to the non-polar V379. **(b)** In the V379A mutant of *EryACS1* (GCS) the active site provides more space to presumably accommodate glycolyl-AMP better.



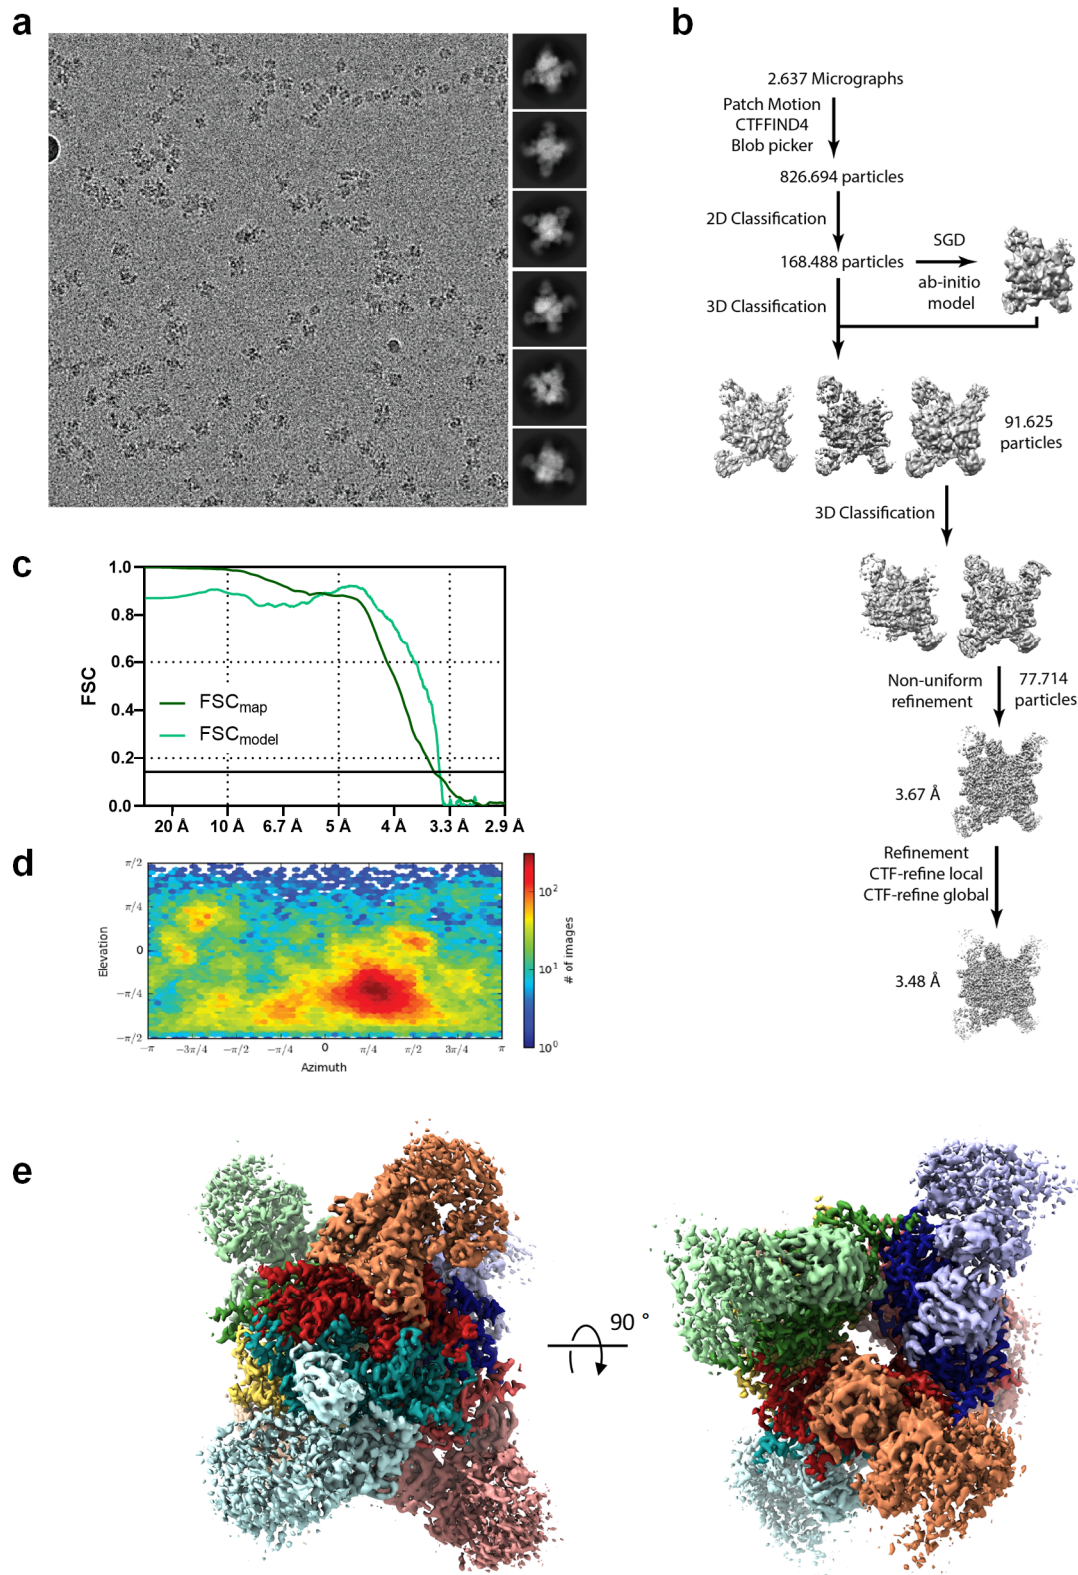

**Supplementary Figure 2. Cryogenic electron microscopy (Cryo-EM) data collection and analysis for *MePCC*.** (a) A representative cryo-EM micrograph collected on an FEI Glacios microscope, operated at 200 kV and equipped with a K2 camera and representative reference-free 2D class averages. (b) Overview of the cryo-EM data processing scheme. (c) FSC<sub>map</sub>: Gold-standard fourier shell correlation (FSC) plot from the final round of refinement in cryoSPARC. FSC<sub>model</sub>: Model vs. map FSC for the final Phenix real space refined model. (d) Angular distribution of the particles used for the final round of refinement. (e) 3.48 Å resolution cryo-EM structure of *MePCC*.

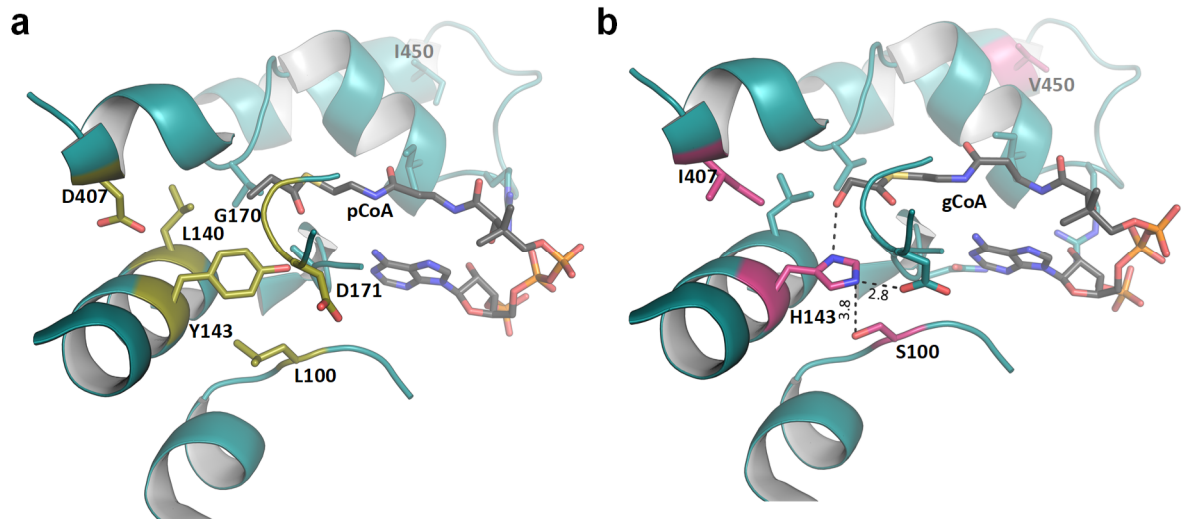

**Supplementary Figure 3. Active site comparison of propionyl-CoA carboxylase of *M. extorquens* and engineered glycolyl-CoA carboxylase.** (a) Cryo-EM structure of propionyl-CoA carboxylase of *M. extorquens* (*MePCC*) active site (PDB 6YBP). Propionyl-CoA (pCoA) was modelled according to the position of methylmalonyl-CoA in PDB 1ON3 (b) Cryo-EM structure of engineered glycolyl-CoA carboxylase active site (PDB 6YBQ). Glycolyl-CoA (gCoA) was modelled according to the position of methylmalonyl-CoA in PDB 1ON3 with additional manual fitting that reflects the new active site architecture and coordination distances. Residues targeted during rational design of the active site are colored in yellow. Actual active site changes in the GCC M4 and M5 mutants are colored in pink. Potential new hydrogen bonds are depicted as dashed lines. Distances are given in Å. The Y143H mutation is likely engaging in hydrogen bonding with the hydroxyl group of glycolyl-CoA. The L100S mutation is assumed to fix H143 in a rotamer conformation facilitating hydrogen bonding interaction with glycolyl-CoA. The I450V mutation is located in an  $\alpha$ -helix nearby and may impact distances within the active site or at the interface with the biotin carboxylase subunit. In addition to the four mutations in and around the active site, GCC M5 features an additional mutation outside of the active site (W502R), which is located at the rotational symmetry of the enzyme oligomer.

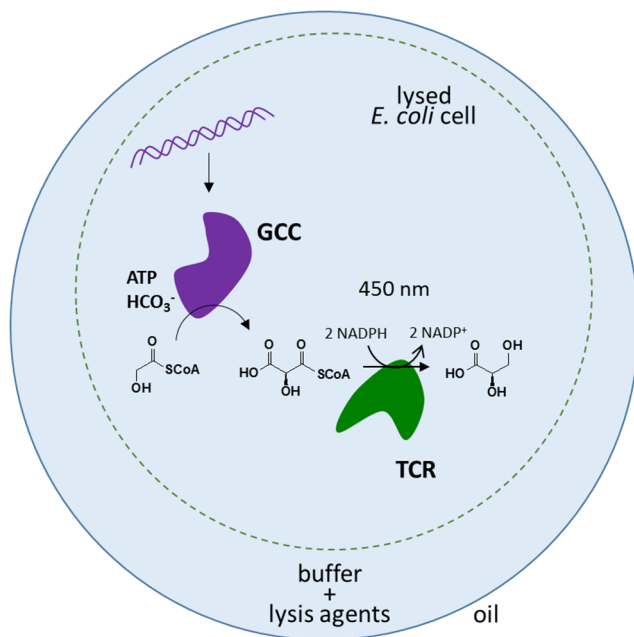

**Supplementary Figure 4. Scheme of microfluidic assay for activity measurements of glycolyl-CoA carboxylase (GCC).** Either purified GCC or single *E. coli* cells expressing variants of GCC were encapsulated in water-in-oil droplets. ATP, KHCO<sub>3</sub> and glycolyl-CoA were provided as substrates. The formation of the carboxylation product tartronyl-CoA was coupled to a decrease in NADPH fluorescence by its reduction to glycerate by the coupling enzyme TCR. In order to screen for GCC variants with decreased ATP hydrolysis to carboxylation ratios, the amount of ATP within the droplets was limited.

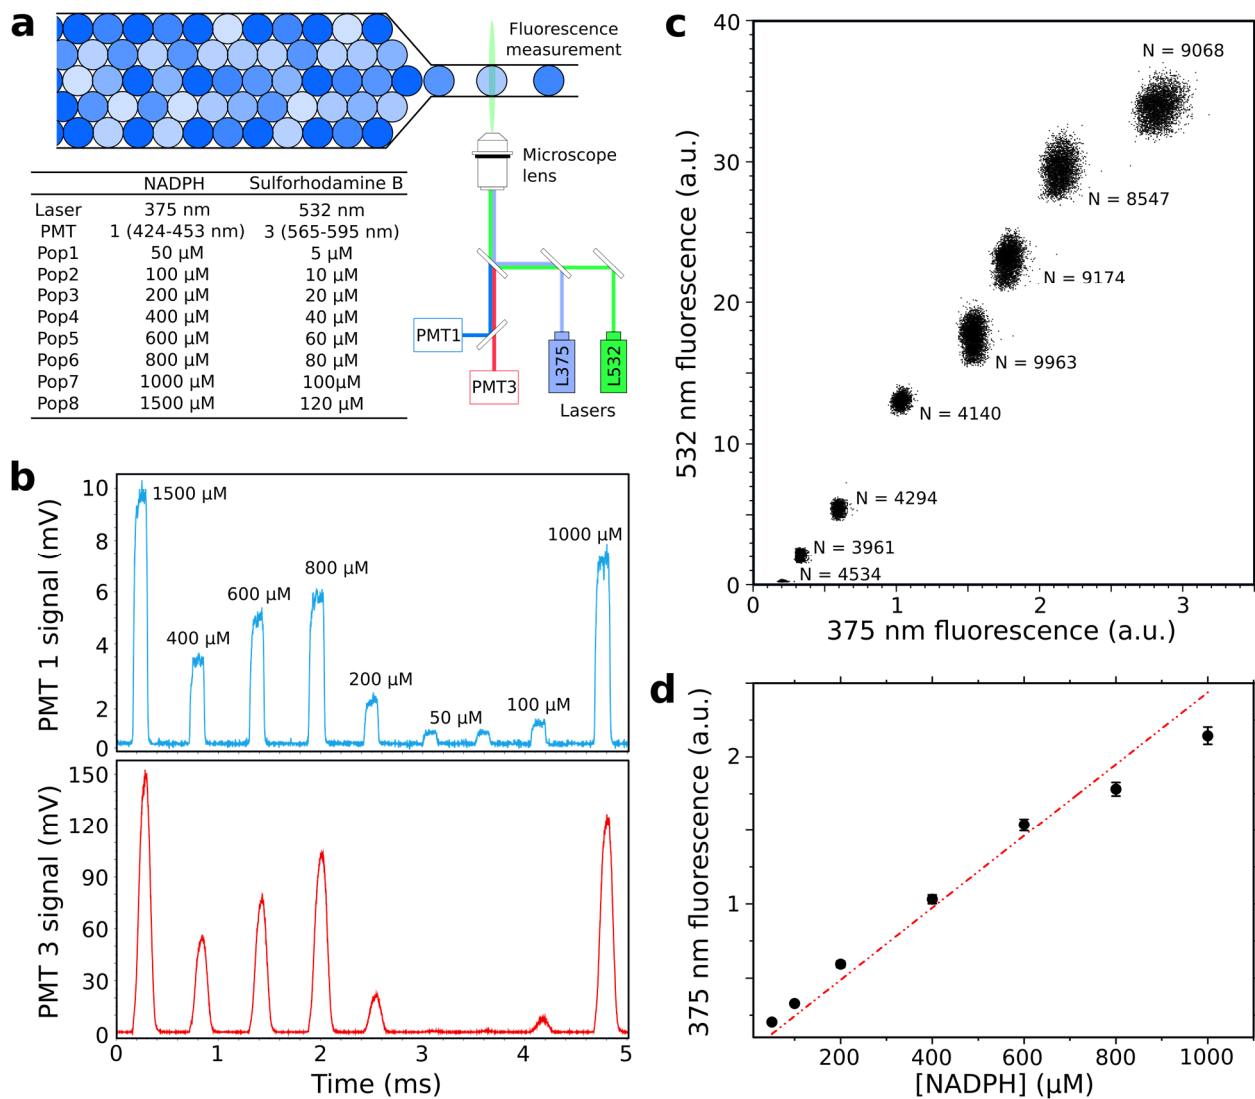

**Supplementary Figure 5. Microfluidic fluorescence measurements.** (a) Scheme of the microfluidic optical set up. Single droplet fluorescence was measured at kHz frequencies inside microchannels using the combination of two lasers (375 and 532 nm) with two photomultiplier tubes (PMT1 and PMT3). The optical set up allowed the detection of either NADPH fluorescence (enzymatic read out) or sulforhodamine B fluorescence (barcoding). To make a NADPH fluorescence calibration, an 8-bit emulsion of w/o droplets containing different concentrations of NADPH and sulforhodamine B was produced and analysed. (b) Time sequence of the signal of PMT1 (NADPH) and PMT3 (sulforhodamine B) for the corresponding 8-bit emulsion. (c) 2D plot showing the fluorescence distribution of the corresponding 8-bit emulsion. (d) NADPH concentration versus fluorescence level using the microfluidic set up. Data represent mean  $\pm$  SD for  $n \geq 3961$  measured droplets.

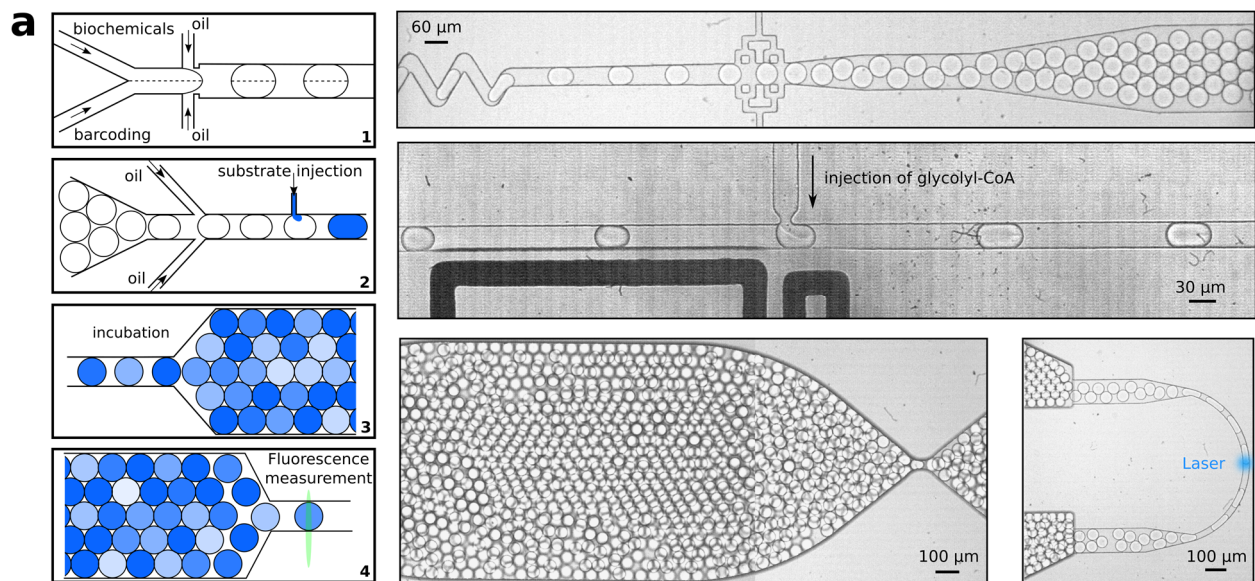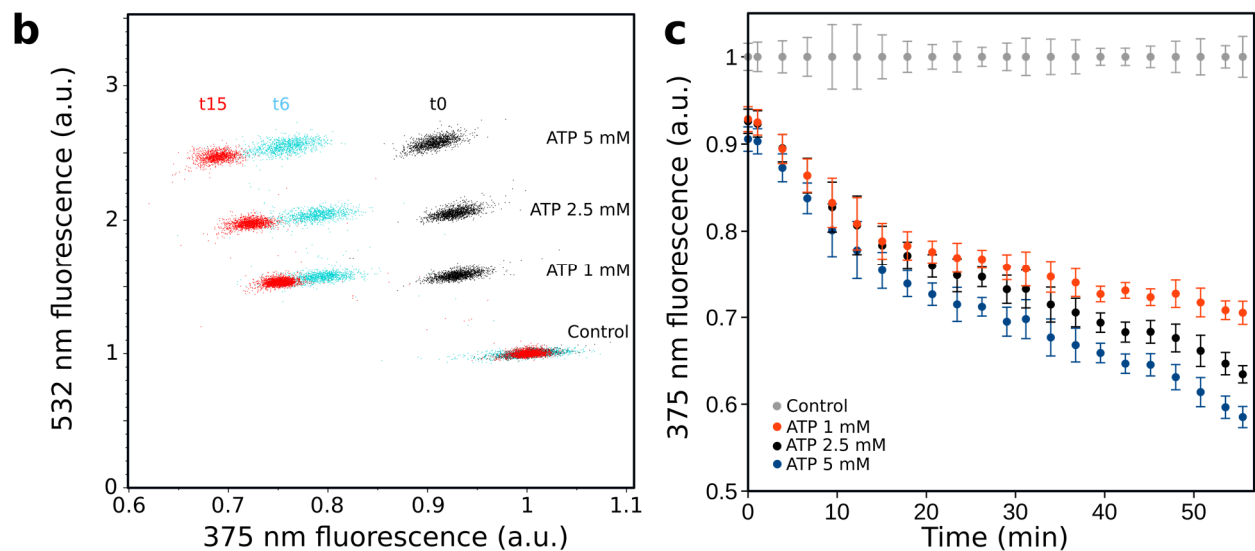

**Supplementary Figure 6. Microfluidic assay for activity measurements of variant 3 of glycolyl-CoA carboxylase (GCC M3) with on chip incubation.** (a) Microfluidic workflow: droplets were produced (1), collected off-chip and reloaded in a kinetic device (2). Glycolyl-CoA was picoinjected (2) and droplets were incubated on-chip (3). NADPH fluorescence was measured over time at different measurement loops (4). (b) 2D plot showing NADPH oxidation over time in four different populations of droplets. Except for population 1, all populations contained  $53 \mu\text{g mL}^{-1}$  GCC M3. Population 1: 1 mM ATP,  $30 \mu\text{M}$  sulforhodamine B; population 2: 1 mM ATP,  $60 \mu\text{M}$  sulforhodamine B; population 3: 2.5 mM ATP,  $90 \mu\text{M}$  sulforhodamine B; population 4: 5 mM ATP,  $120 \mu\text{M}$  sulforhodamine B. (c) The NADPH oxidation over time was dependent on the ATP concentration within the droplets. Data points represent mean  $\pm$  SD ( $n=1500$  measured droplets).

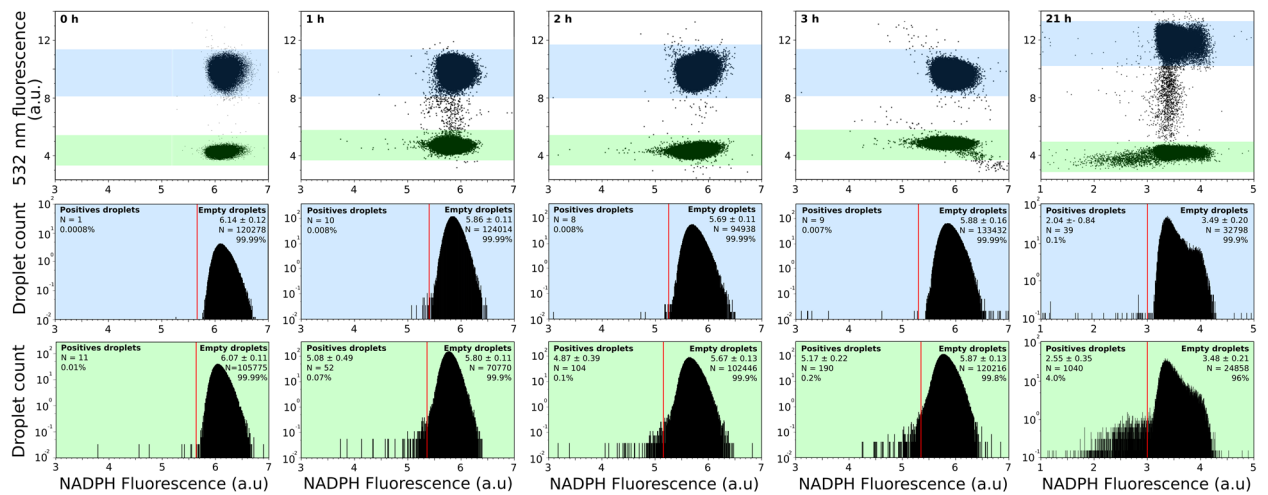

**Supplementary Figure 7. Microfluidic assay with droplets containing single cells.** *E. coli* cells expressing either PCC WT or GCC M3 were encapsulated into droplets with all assay components. The droplets with PCC WT contained 60  $\mu$ M sulforhodamine B and the droplets with GCC M3 contained 20  $\mu$ M sulforhodamine B as a barcoding. After encapsulation of single cells, the droplets were collected, incubated at 37  $^{\circ}$ C and fluorescence was measured directly after encapsulation, and 1 h, 2 h, 3 h and 21 h after encapsulation. 2D and 1D histograms show the fluorescence distribution of the 2-bit emulsion over time. The blue population corresponds to PCC WT cells and the green population corresponds to GCC M3 cells. The red line threshold gates negative and positive droplets and is defined as the mean value of the main population (empty droplets) minus 4  $\sigma$  (standard deviation).

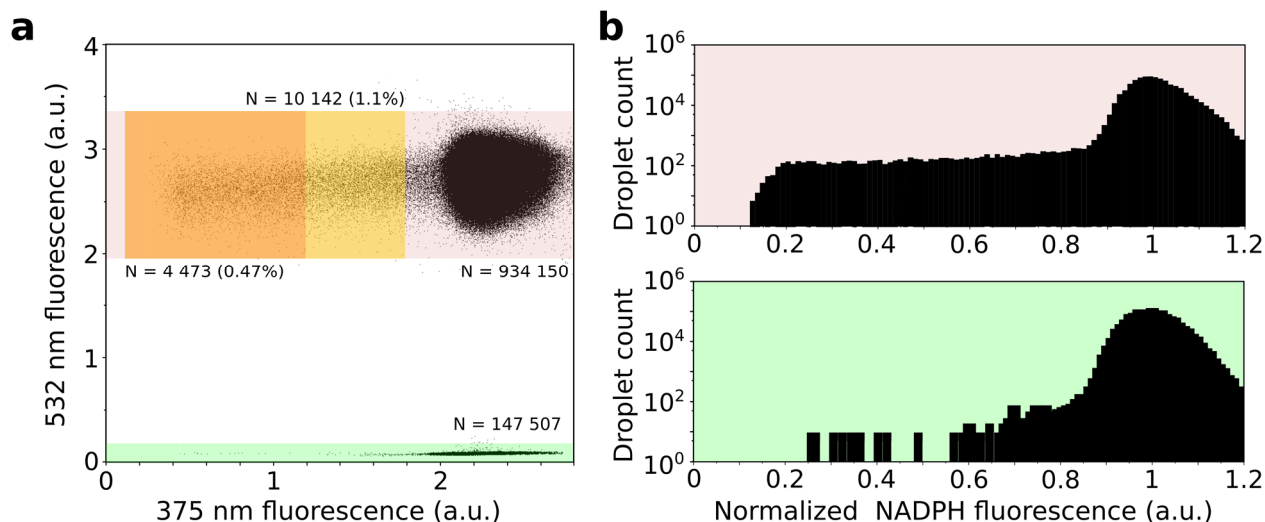

**Supplementary Figure 8. Microfluidic assay for cells expressing variants of glycolyl-CoA carboxylase (GCC).** *E. coli* cells expressing variants of GCC were encapsulated into water-in-oil droplets including lysis agents, reaction substrates and sulforhodamine B as coding dye (droplets with cells expressing GCC M3 2  $\mu$ M and with cells expressing GCC variants 20  $\mu$ M). The library contained variants that produce more carboxylation product (tartronyl-CoA) which led to more NADPH oxidation and therefore higher decrease in NADPH fluorescence signal. 2D (**a**) and 1D (**b**) histograms show the fluorescence distribution of the 2-bit emulsion after overnight incubation. The green population corresponds to PCC M3 cells and the pink population corresponds to cells expressing GCC variants. The yellow gate corresponds to active variants (defined as the mean of the main population minus  $4\sigma$ ) and the orange gate corresponds to variants showing a higher activity than GCC M3. Note that only 10% of the droplets contain cells, therefore 0.47% of droplets containing more active variants corresponds to 4.7% of more active variants in total.

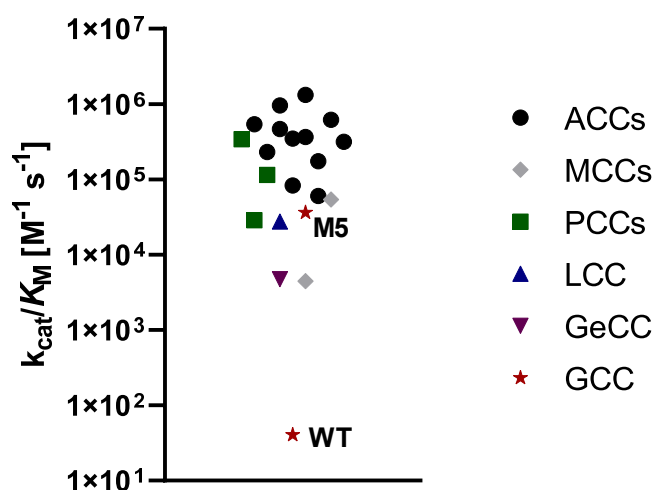

**Supplementary Figure 9. Catalytic efficiencies of different biotin-dependent acyl-CoA carboxylases.** Data for acetyl-CoA carboxylases (ACCs), methyl-crotonyl-CoA carboxylases (MCCs) and propionyl-CoA carboxylases (PCCs) were taken from<sup>6</sup>. Data for long-chain acyl-CoA carboxylase (LCC) were calculated from<sup>17</sup>. Data for geranyl-CoA carboxylase (GeCC) were calculated from<sup>18</sup>. All data represent catalytic efficiencies of the respective enzymes with their respective physiological substrate, except for GCC WT (the evolutionary starting point of GCC) and GCC M5, which represent the catalytic efficiency of these enzymes with glycolyl-CoA.



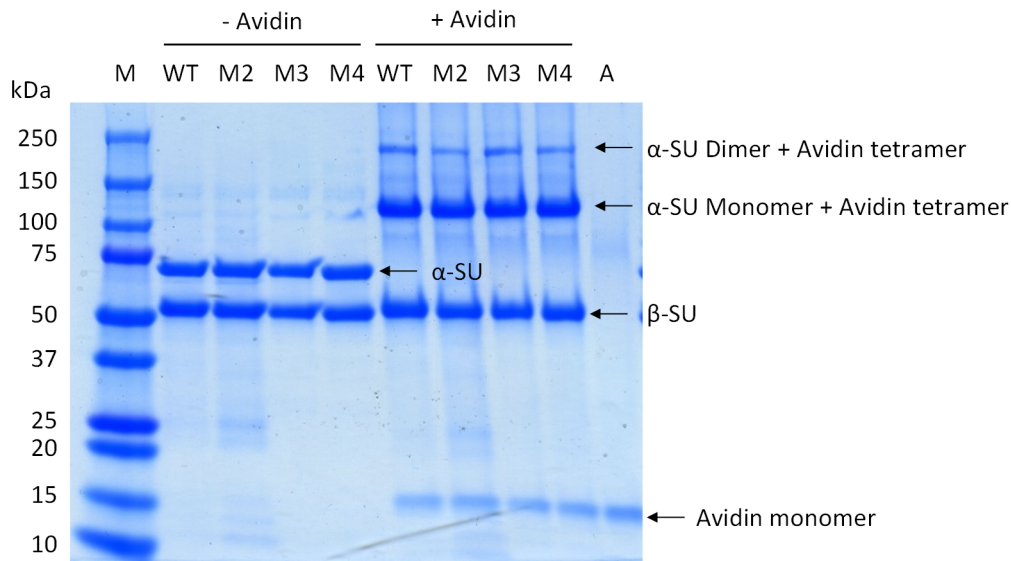

**Supplementary Figure 10. Avidin gel shift assay of to test for full biotinylation of propionyl-CoA carboxylase of *M. extorquens* (WT) and different engineered glycolyl-CoA carboxylase (GCC) variants.** The gel is representative of two independent experiments with similar results. M: molecular weight standard, WT: PCC *M. extorquens* wildtype, M2: GCC M2, M3: GCC M3, M4: GCC M4, A: avidin,  $\alpha$ -SU:  $\alpha$ -subunit of PCC/GCC,  $\beta$ -SU:  $\beta$ -subunit of PCC/GCC. Theoretical molecular weight:  $\alpha$ -SU 72 kDa,  $\beta$ -SU: 58 kDa,  $\alpha$ -SU monomer + avidin tetramer 140 kDa,  $\alpha$ -SU dimer + avidin tetramer 212 kDa, avidin monomer 17 kDa.

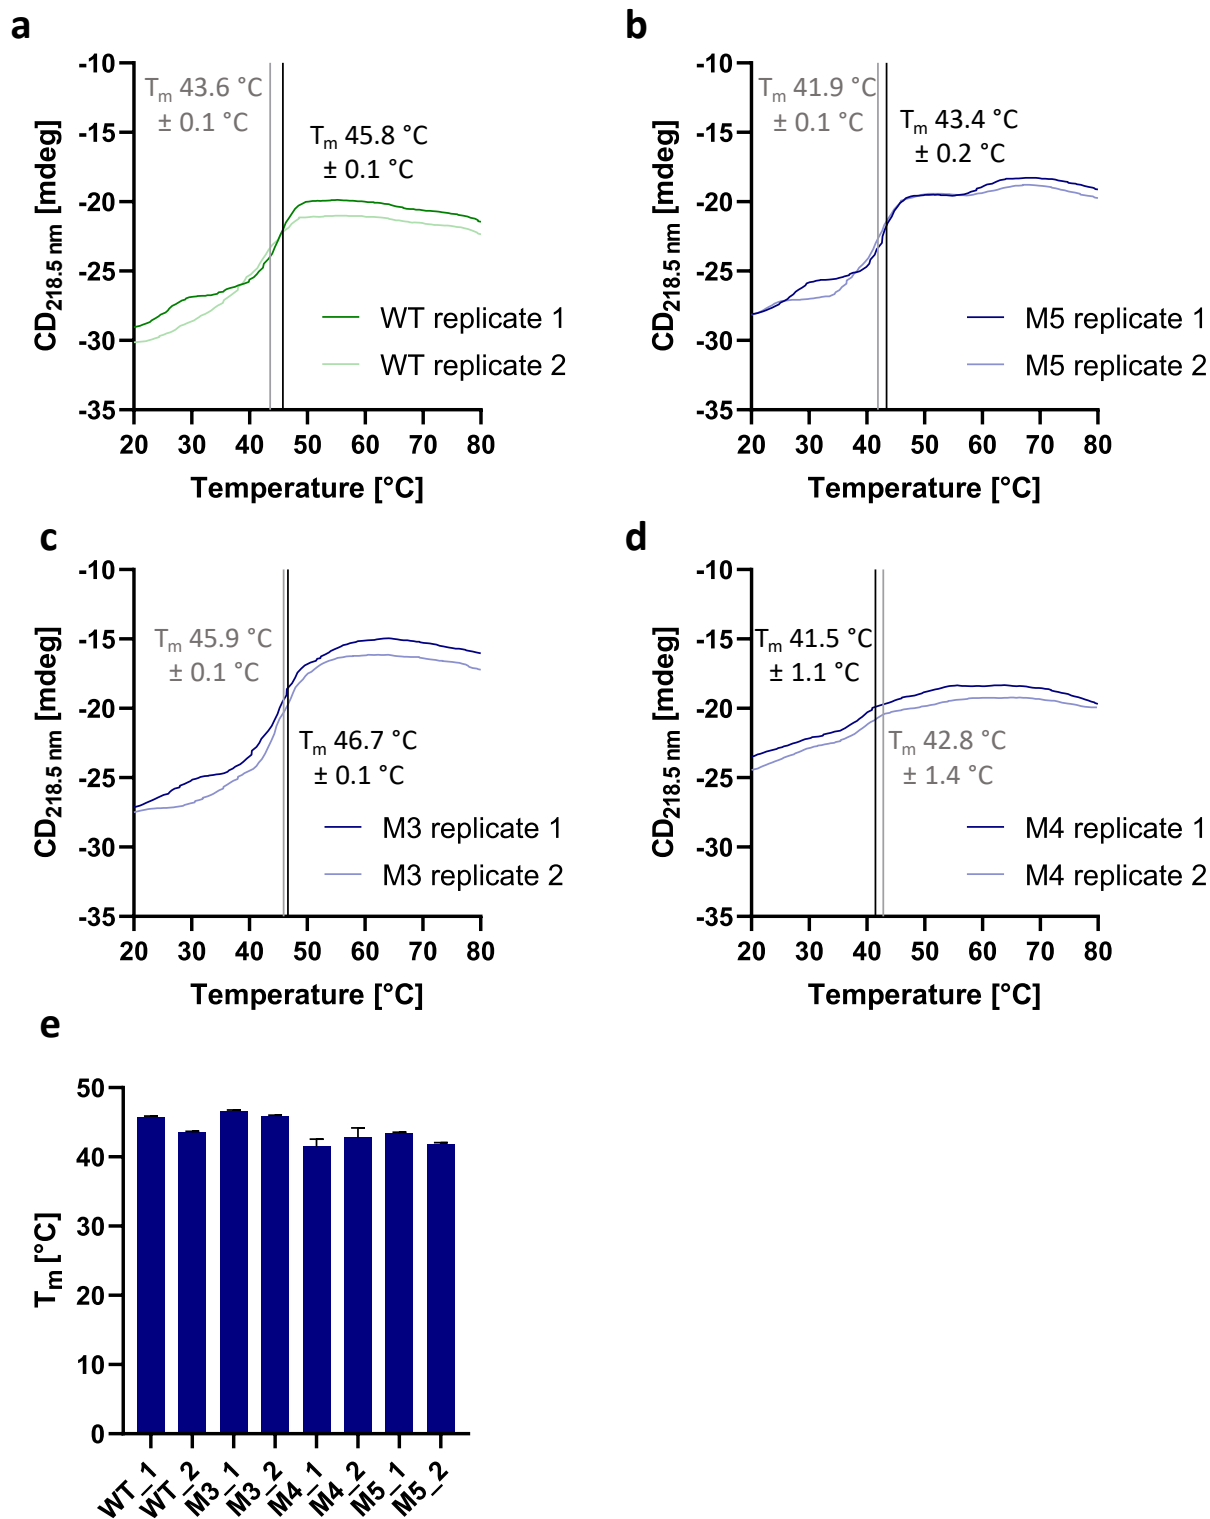

**Supplementary Figure 11. Circular dichroism spectroscopy for melting point determination of GCC variants.** Two technical replicates are shown for each enzyme variant. (a) *MePCC* WT. (b) GCC M5. (c) GCC M3. (d) GCC M4. (e) Comparison of melting temperatures ( $T_m$ ) for the different variants. Shown are the calculated values for the inflection points of each individual curve (a-d), error bars represent the standard error of the fit. Calculations were performed using the Jasco Spectra Manager software.

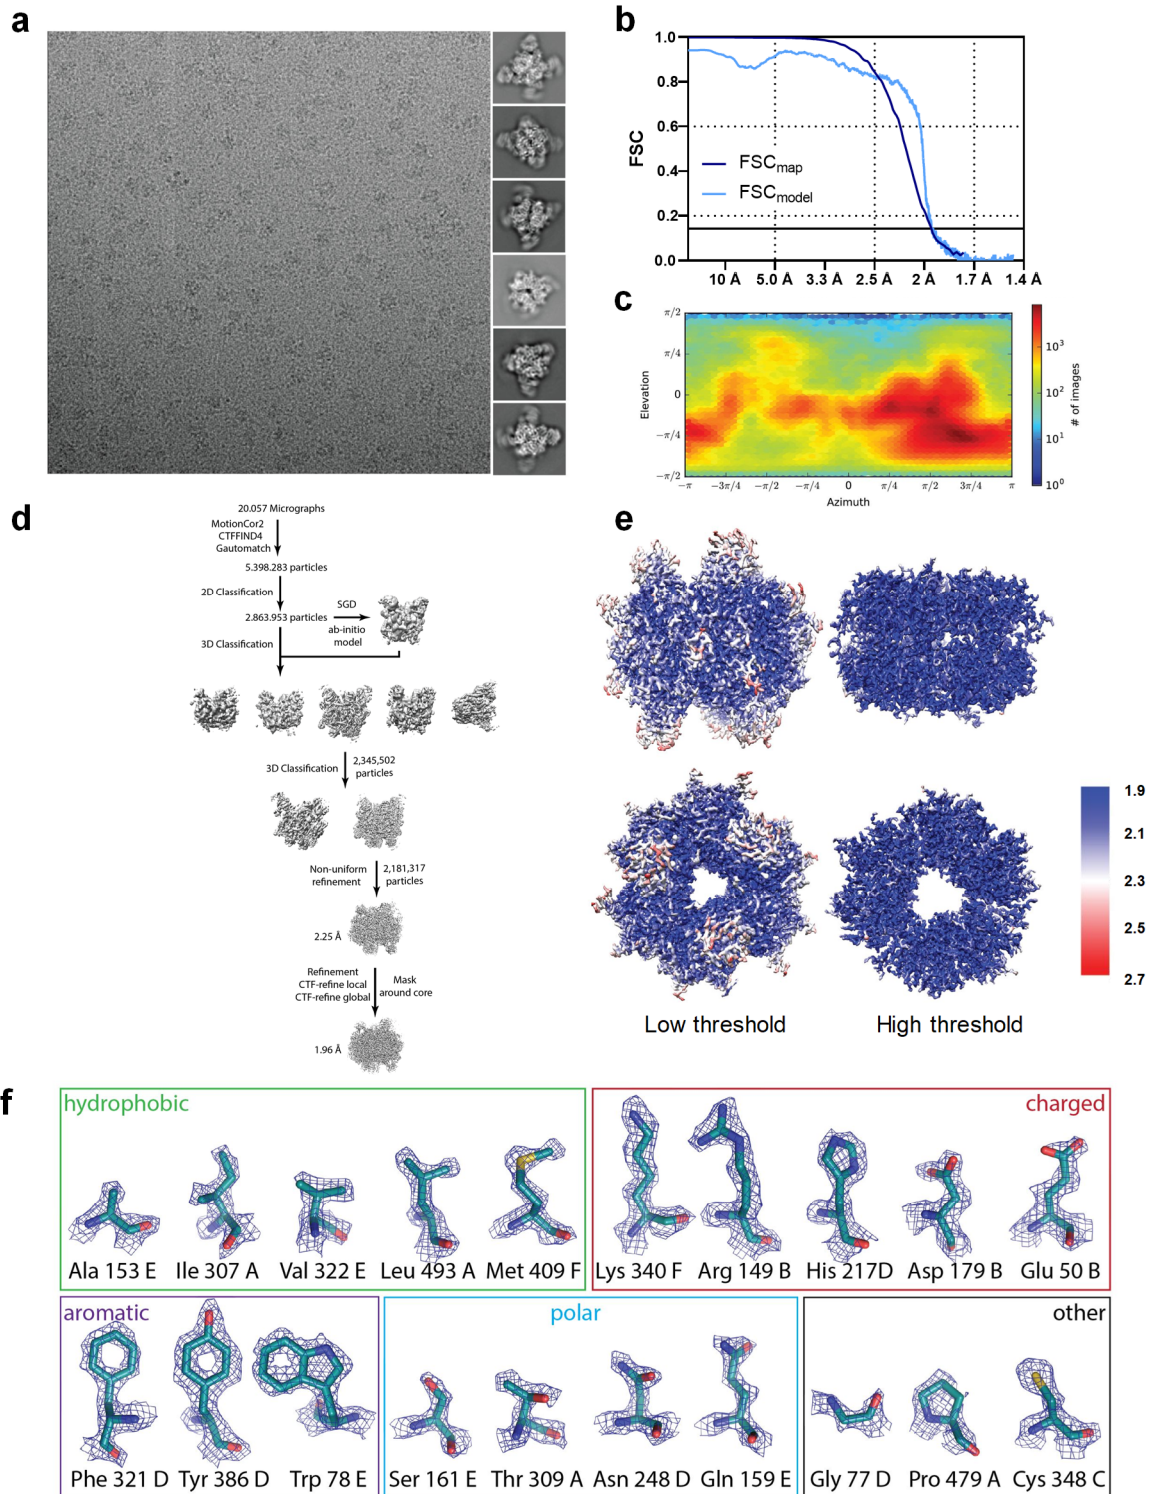

**Supplementary Figure 12. Cryogenic electron microscopy (Cryo-EM) data collection and analysis for GCC M5.** (a) A representative cryo-EM micrograph collected on an FEI Titan Krios microscope, operated at 300 kV and equipped with a K3 camera and representative reference-free 2D class averages. (b) Tight: Gold-standard fourier shell correlation (FSC) plot from the final round of refinement in cryoSPARC. Masked: Model vs. map FSC for the final Phenix real space refined model. (c) Angular distribution of the particles used for the final round of refinement. (d) Overview of the cryo-EM data processing scheme. (e) Local resolution analysis of GCC M5. Maps show variation in local resolution of the central  $\beta$ -core of the complex, as estimated by cryoSPARC. Left: Low density threshold image, showing the presence of the BCCP domain. Right: High-density threshold image, showing the high resolved  $\beta$ -domains of the molecule (f) Representative side-chains of the complex (in stick representation) and surrounding electron density map. Maps are displayed as a mesh using a contour level of up to 2 Å around the atoms. Subunits and residue numbers are specified.

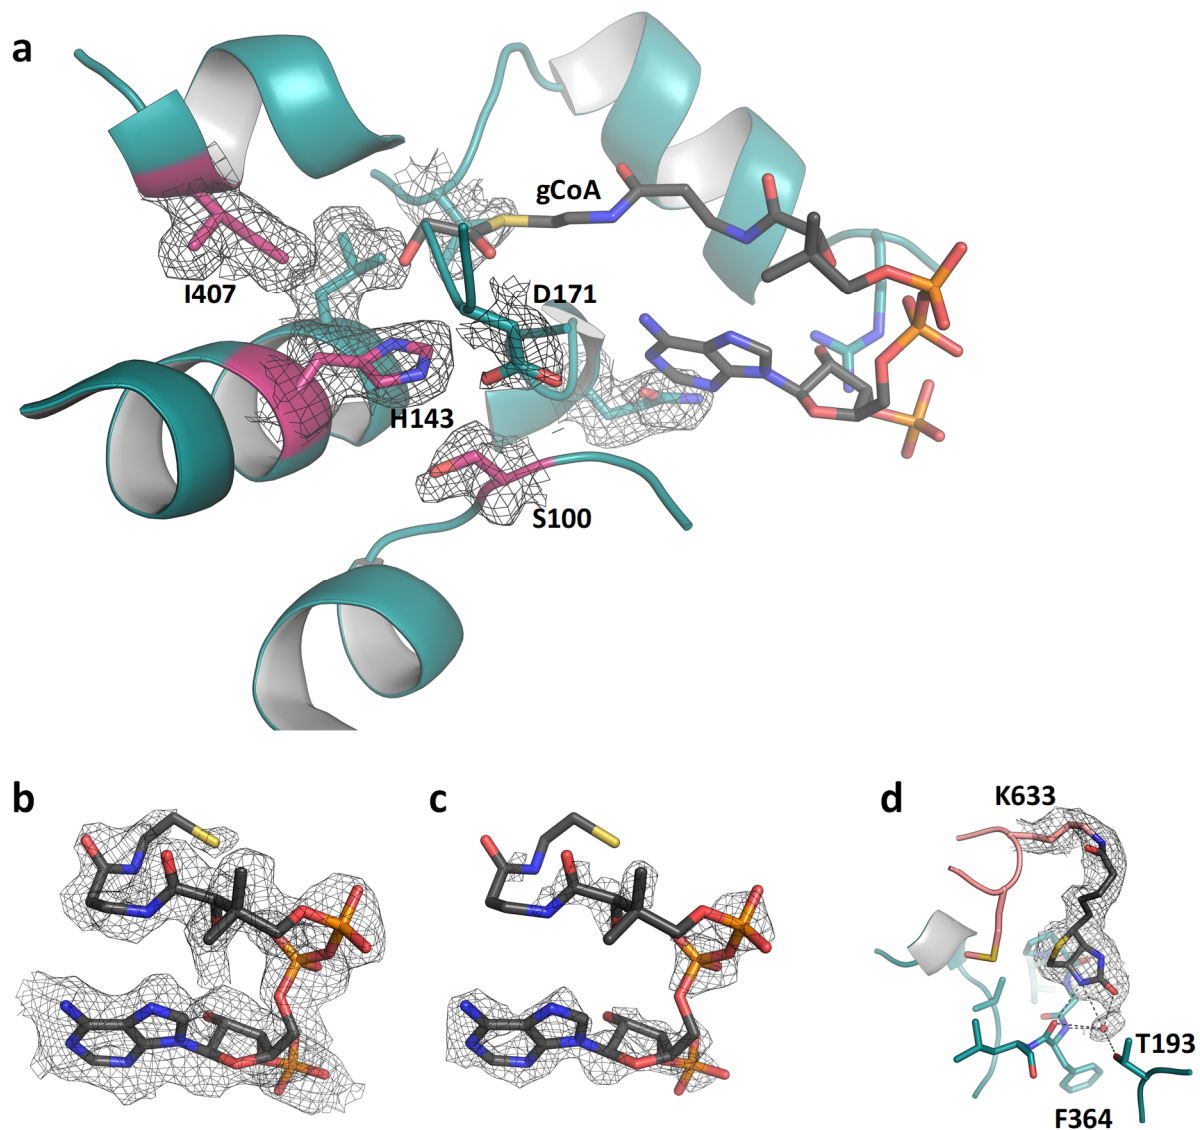

**Supplementary Figure 13. Electron density maps for GCC M5 as obtained by cryo-EM.** (a) Active site of GCC M5. Rationally introduced mutations are highlighted in pink. Glycolyl-CoA (gCoA) was modelled based on the position of methylmalonyl-CoA in PDB 1ON3 with additional manual fitting that reflects the GCC M5 active site architecture and coordination distances. (b) Electron density map at low contour level for coenzyme A as present in the cryo-EM structure. (c) Electron density map at high contour level for coenzyme A emphasizing the tight binding of the adenosyl moiety and the flexibility of the pantetheine arm. (d) Biotin cofactor covalently bound to Lys633 of GCC M5  $\alpha$ -subunit (salmon).  $\beta$ -subunits are shown in teal. Possible hydrogen bonds are depicted as dashed lines.

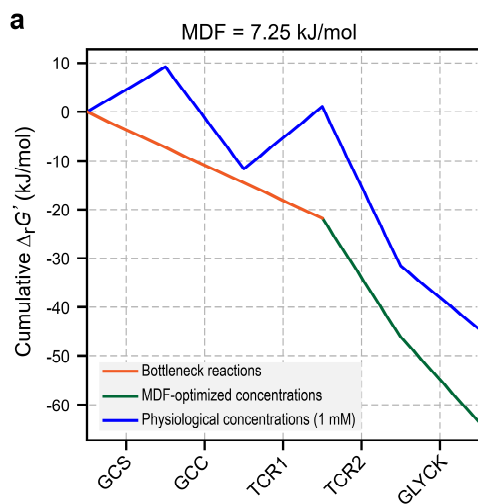

| Reaction | $\Delta_r G^{\circ}$<br>kJ/mol | $\Delta_r G^m$<br>kJ/mol | $\Delta_r G'$<br>kJ/mol | Shadow price |
|----------|--------------------------------|--------------------------|-------------------------|--------------|
| GCS      | 9.25                           | 9.25                     | -7.25                   | 0.33         |
| GCC      | -20.86                         | -20.86                   | -7.25                   | 0.33         |
| TCR1     | 29.78                          | 12.67                    | -7.25                   | 0.33         |
| TCR2     | -32.68                         | -32.68                   | -24.39                  | 0.00         |
| GLYCK    | -12.85                         | -12.85                   | -17.45                  | 0.00         |

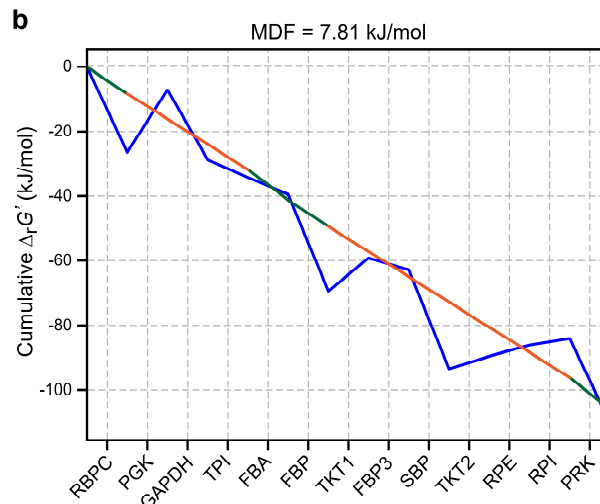

| Reaction | $\Delta_r G^{\circ}$<br>kJ/mol | $\Delta_r G^m$<br>kJ/mol | $\Delta_r G'$<br>kJ/mol | Shadow price |
|----------|--------------------------------|--------------------------|-------------------------|--------------|
| RBPC     | -26.39                         | -26.39                   | -8.30                   | 0.00         |
| PGK      | 19.32                          | 19.32                    | -7.81                   | 0.21         |
| GAPDH    | -4.47                          | -21.59                   | -7.81                   | 0.21         |
| TPI      | -5.58                          | -5.58                    | -7.81                   | 0.07         |
| FBA      | -22.39                         | -5.28                    | -9.49                   | 0.00         |
| FBP      | -12.77                         | -29.88                   | -8.16                   | 0.00         |
| TKT1     | 10.19                          | 10.19                    | -7.81                   | 0.07         |
| FBP3     | -20.84                         | -3.72                    | -7.81                   | 0.07         |
| SBP      | -13.45                         | -30.57                   | -7.81                   | 0.07         |
| TKT2     | 3.88                           | 3.88                     | -7.81                   | 0.07         |
| REP      | 3.39                           | 3.39                     | -7.81                   | 0.14         |
| RPI      | 2.08                           | 2.08                     | -7.81                   | 0.07         |
| PRK      | -25.88                         | -25.88                   | -9.74                   | 0.00         |

**Supplementary Figure 14. Optimized thermodynamic profiles and Max-min Driving Force (MDF) of the tartronyl-CoA pathway (a) and the Calvin-Benson-Bassham (CBB) cycle (b).** Blue lines correspond to  $\Delta_r G^{\circ}$  values of pathway reactions at pH 7, ionic strength 0.25 M and pMg 3. Green lines correspond to  $\Delta_r G'$  values of pathway reactions after optimization of metabolite concentration towards maximal MDF (see Methods). The orange lines represent the predicted bottleneck reactions (positive shadow prices).

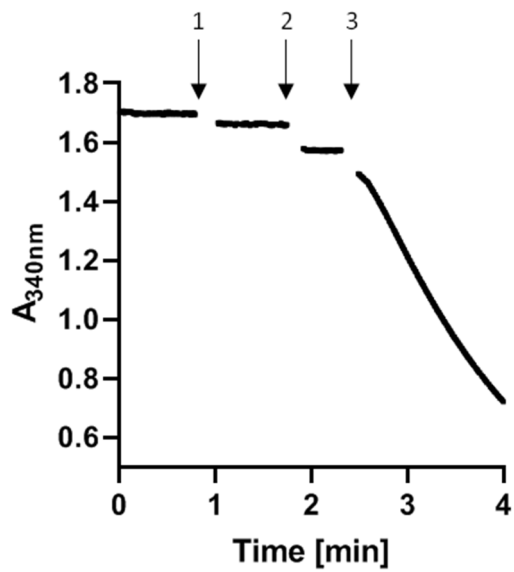

**Supplementary Figure 15. Spectrophotometric assay for activity assessment of the complete TaCo pathway.** The assay contained 100 mM MOPS/KOH, 10 mM MgCl<sub>2</sub>, 0.4 mM NADPH, 50 mM KHCO<sub>3</sub>, 0.15 mg mL<sup>-1</sup> GCS, 0.56 mg mL<sup>-1</sup> GCC M4, 1.1 mg mL<sup>-1</sup> TCR. 1: addition of 20 mM glycolate, 2: addition of 1 mM coenzyme A, 3: addition of 5 mM ATP. Data shown are representative of three independent experiments.

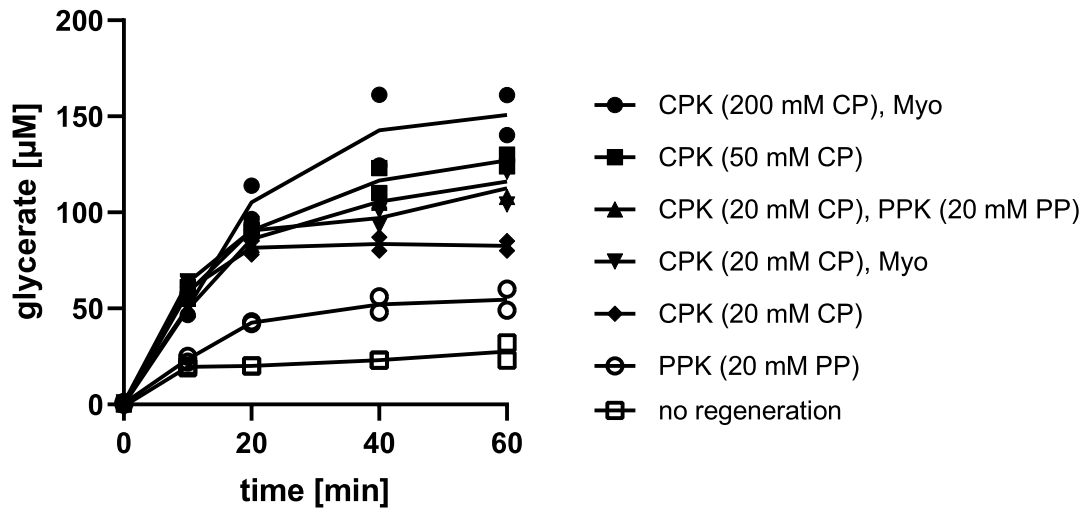

**Supplementary Figure 16. Optimization of ATP regeneration for *in vitro* operation of the TaCo pathway.** The assays contained 100 mM MOPS/KOH pH 7.8, 5 mM ATP, 10 mM  $\text{MgCl}_2$ , 2 mM coenzyme A, 2 mM NADPH, 50 mM  $\text{KHCO}_3$ , 1 mM glycolate, 150  $\mu\text{g mL}^{-1}$  GCS, 608  $\mu\text{g mL}^{-1}$  GCC and 1120  $\mu\text{g mL}^{-1}$  TCR. Additionally, the assays contained 20 - 500 mM phosphocreatine (CP), 6.7 U  $\text{mL}^{-1}$  creatine phosphokinase (CPK), 20 mM polyphosphate (PP), 33  $\mu\text{g mL}^{-1}$  polyphosphate kinase 2-I (PPK2-I) in combination with 133  $\mu\text{g mL}^{-1}$  polyphosphate kinase 2-II (PPK2-II) or 67  $\mu\text{g mL}^{-1}$  myokinase (and variations thereof as indicated in the legend). Shown is mean and individual data points of two independent experiments.

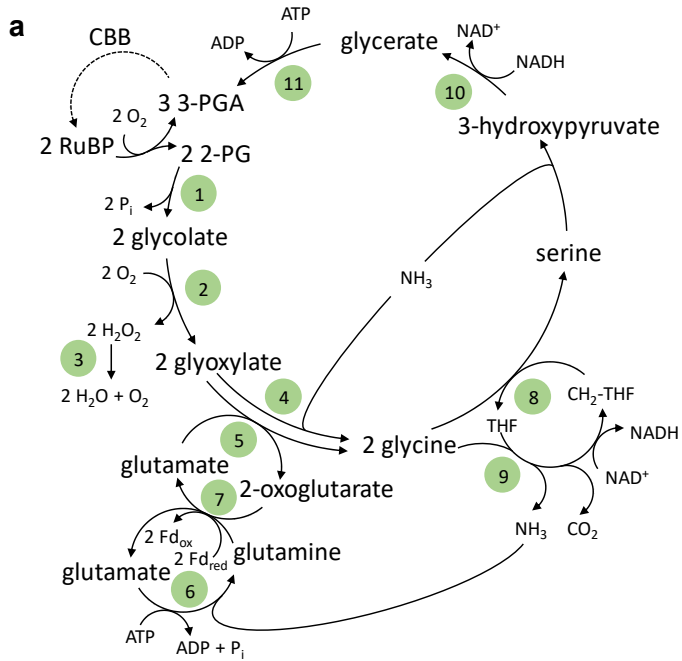

| #  | enzyme                                  |
|----|-----------------------------------------|
| 1  | phosphoglycolate phosphatase            |
| 2  | glycolate oxidase                       |
| 3  | catalase                                |
| 4  | serine/glyoxylate aminotransferase      |
| 5  | glutamate/glyoxylate aminotransferase   |
| 6  | glutamine synthetase                    |
| 7  | glutamine/oxoglutarate aminotransferase |
| 8  | serine hydroxymethyl transferase        |
| 9  | glycine decarboxylase                   |
| 10 | hydroxypyruvate reductase               |
| 11 | glycerate kinase                        |

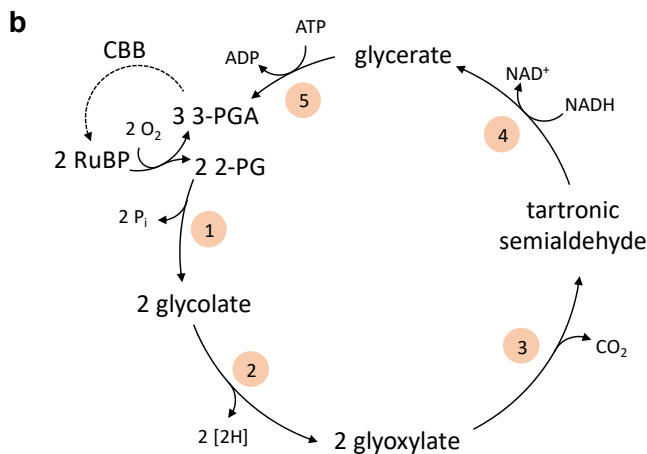

| # | enzyme                           |
|---|----------------------------------|
| 1 | phosphoglycolate phosphatase     |
| 2 | glycolate dehydrogenase          |
| 3 | glyoxylate carboligase           |
| 4 | tartronic semialdehyde reductase |
| 5 | glycerate kinase                 |

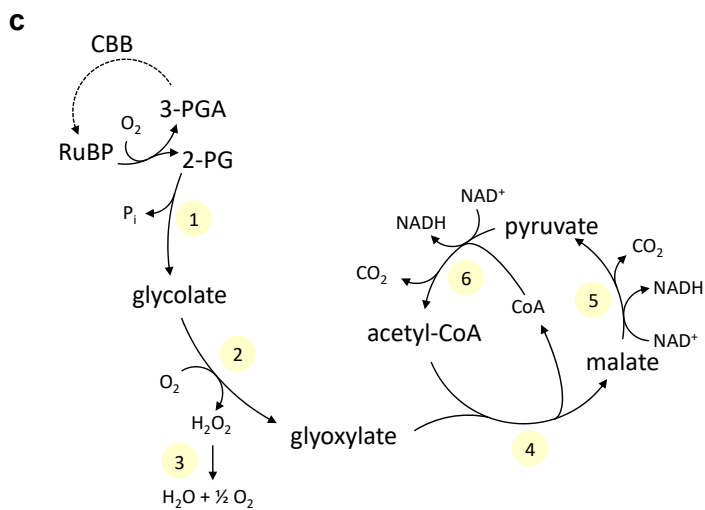

| # | enzyme                       |
|---|------------------------------|
| 1 | phosphoglycolate phosphatase |
| 2 | glycolate oxidase            |
| 3 | catalase                     |
| 4 | malate synthase              |
| 5 | NAD-malic enzyme             |
| 6 | pyruvate dehydrogenase       |



**d**

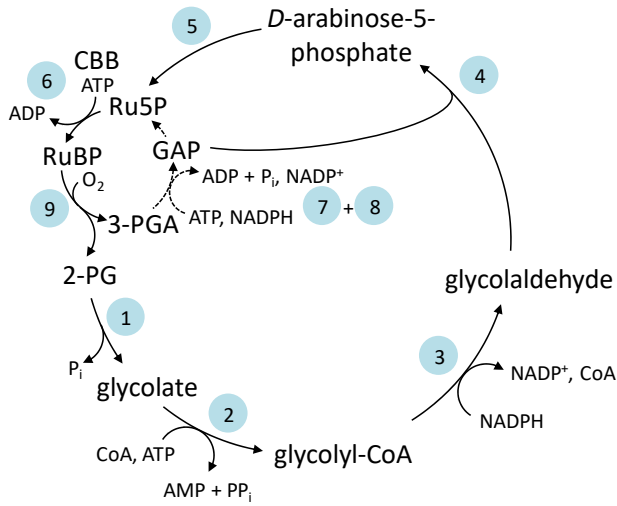

| # | enzyme                                   |
|---|------------------------------------------|
| 1 | phosphoglycolate phosphatase             |
| 2 | glycolyl-CoA synthetase                  |
| 3 | glycolyl-CoA reductase                   |
| 4 | fructose-6-phosphate aldolase            |
| 5 | arabinose-5-phosphate isomerase          |
| 6 | phosphoribulokinase                      |
| 7 | phosphoglycerate kinase                  |
| 8 | glyceraldehyde-3-phosphate dehydrogenase |
| 9 | RuBisCO                                  |

**e**

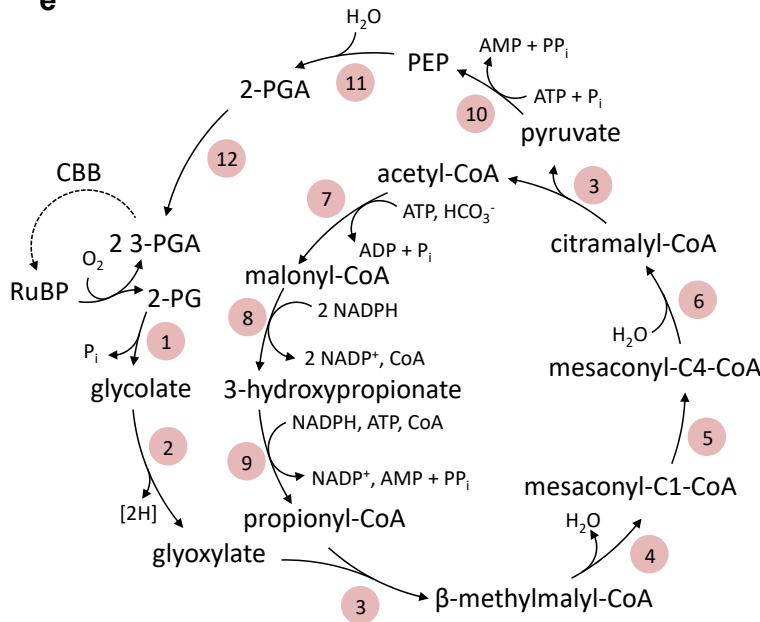

| #  | enzyme                                           |
|----|--------------------------------------------------|
| 1  | phosphoglycolate phosphatase                     |
| 2  | glycolate dehydrogenase                          |
| 3  | malyl-CoA/β-methylmalyl-CoA/citramalyl-CoA lyase |
| 4  | mesaconyl-C1-CoA hydratase                       |
| 5  | mesaconyl-CoA transferase                        |
| 6  | mesaconyl-C4-CoA hydratase                       |
| 7  | acetyl-CoA carboxylase                           |
| 8  | malonyl-CoA reductase                            |
| 9  | propionyl-CoA synthase                           |
| 10 | pyruvate phosphate dikinase                      |
| 11 | enolase                                          |
| 12 | phosphoglycerate mutase                          |

**f**

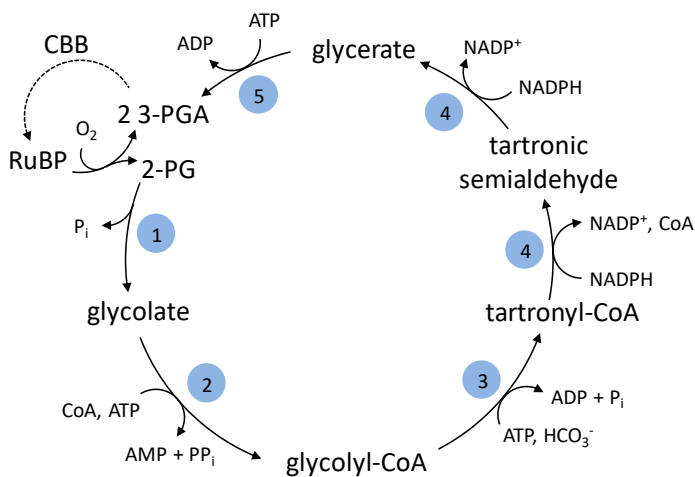

| # | enzyme                       |
|---|------------------------------|
| 1 | phosphoglycolate phosphatase |
| 2 | glycolyl-CoA synthetase      |
| 3 | glycolyl-CoA carboxylase     |
| 4 | tartronyl-CoA reductase      |
| 5 | glycerate kinase             |

**Supplementary Figure 17. Photorespiratory C<sub>2</sub>-pathway and synthetic bypasses.** (a) Natural (canonical) photorespiration of C<sub>3</sub>-plants. (b) Glycerate bypass<sup>19</sup>. Notably, the physiological electron acceptor of glycolate dehydrogenase (2) is not known. (c) Glycolate oxidation pathway<sup>20</sup>. A variation was introduced into Tobacco plants with glycolate dehydrogenase instead of glycolate oxidase<sup>21</sup>. (d) Arabinose-5-phosphate shunt<sup>1</sup>. (e) 3-OH-propionate bypass<sup>22</sup>. (f) tartronyl-CoA pathway (this work).

*Abbreviations:* CBB: Calvin-Benson-Bassham cycle, RuBP: ribulose-1,5-bisphosphate, THF: tetrahydrofolate, CH<sub>2</sub>-THF: methylenetetrahydrofolate, Fd<sub>red</sub>: reduced ferredoxin, Fd<sub>ox</sub>: oxidized ferredoxin

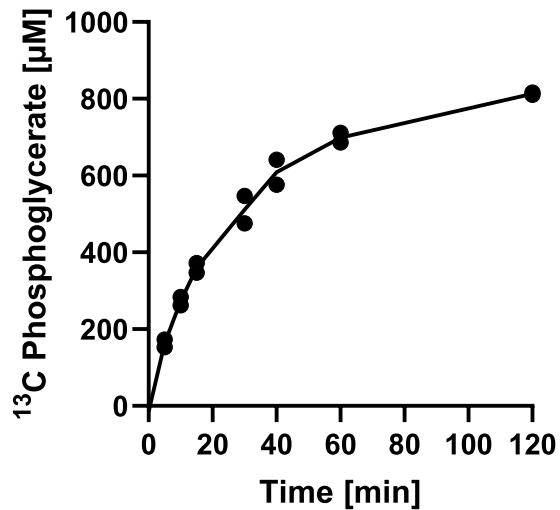

**Supplementary Figure 18. <sup>13</sup>C-phosphoglycerate produced by the TaCo pathway from 2-phosphoglycolate and <sup>13</sup>C bicarbonate.** The experiment demonstrated that the TaCo pathway is able to convert RuBisCO's oxygenation product, 2-phosphoglycolate, into phosphoglycerate through direct carboxylation (indicated by the incorporation of H<sup>13</sup>CO<sub>3</sub><sup>-</sup>). Furthermore, the experiment showed that (*R*)-glycerate is the product of the TaCo pathway, because *E. coli* GlxK only accepts the (*R*)-stereoisomer of glycerate<sup>23-25</sup>. Shown are the results of two independent experiments as mean and individual data points.

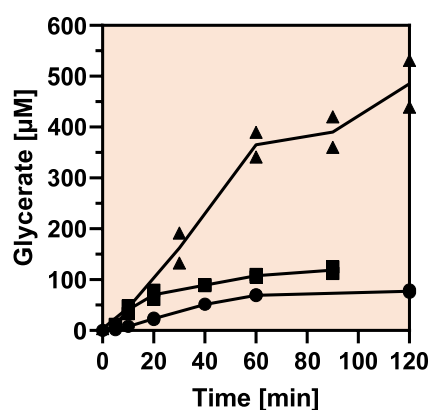

|                                                                     | ●    | ■       | ▲       |
|---------------------------------------------------------------------|------|---------|---------|
| Experiment                                                          | EG_1 | EG_2    | EG_3    |
| EG oxidation                                                        | FucO | Gox0313 | Gox0313 |
| ATP regeneration                                                    | n/a  | CPK     | CPK     |
| phosphocreatine conc. [mM]                                          | n/a  | 10      | 200     |
| NADH oxidase [ $\mu\text{g } \mu\text{L}^{-1}$ ]                    | n/a  | 0.04    | 0.08    |
| final glycerate conc. [ $\mu\text{M}$ ]                             | 77   | 119     | 485     |
| production rate (60 min) [ $\text{nmol min}^{-1} \text{mg}^{-1}$ ]* | 0.4  | 0.6     | 2.1     |

**Supplementary Figure 19. Optimization of experiments for ethylene glycol conversion to glycerate by the ethylene glycol module coupled to the tartronyl-CoA pathway.** In the course of optimization, the enzyme for ethylene glycol oxidation was changed from FucO to Gox0313 and ATP regeneration by creatine phosphokinase (CPK) as well as  $\text{NAD}^+$  regeneration by a water-forming NADH oxidase was included. The conditions for each experiment are depicted in the table. Shown are the results of two independent experiments each. Final glycerate concentration and production rate represent the mean of the two independent experiments shown. EG\_1: ethylene glycol experiment 1, EG\_2: ethylene glycol experiment 2, EG\_3: ethylene glycol experiment 3.

\* Production rate is based on the concentration of TaCo enzymes. n/a - not applicable.

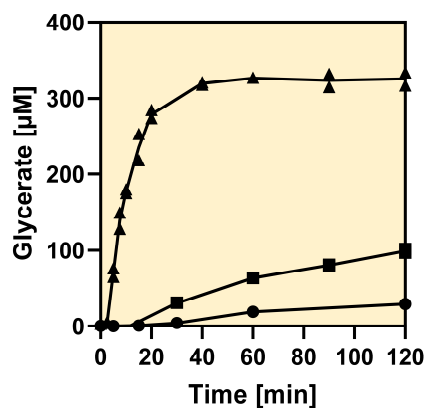

|                                                          | ●                  | ■                  | ▲                   |
|----------------------------------------------------------|--------------------|--------------------|---------------------|
| Experiment                                               | CT_1               | CT_2               | CT_3                |
| NADPH regen.                                             | formate DH         | formate DH         | glucose DH          |
| ATP regen.                                               | PPK2-I, PPK2-II    | PPK2-I, PPK2-II    | CPK, Myo            |
| polyphosphate conc. [mM]                                 | 20                 | 20                 | n/a                 |
| phosphocreatine conc. [mM]                               | n/a                | n/a                | 100                 |
| TaCo addition                                            | @start             | after 120 min      | after 120 min       |
| SucD                                                     | <i>C. kluyveri</i> | <i>C. kluyveri</i> | <i>C. difficile</i> |
| propCoA (start) [µM]                                     | 200                | 1000               | 170                 |
| final glycerate conc. [µM]                               | 31                 | 105                | 331                 |
| rate of TaCo [nmol min <sup>-1</sup> mg <sup>-1</sup> ]* | 0.1                | 0.4                | 4.8                 |

**Supplementary Figure 20. Optimization of experiments for coupling of the tartronyl-CoA pathway to the CETCH cycle for the production of glycerate.** In the course of optimization, the NADPH regeneration was changed from using formate dehydrogenase (formate DH) to glucose dehydrogenase (glucose DH), the ATP regeneration was changed from using polypyrophosphate kinase (PPK2-I and PPK2-II) to creatine phosphokinase (CPK). The enzyme for succinyl-CoA reduction in the CETCH cycle was changed from SucD from *Clostridium kluyveri* to the homolog from *Clostridioides difficile* to reduce side reactivity with glycolyl-CoA. Shown are the results of two independent experiments each. Final glycerate concentration and rate of TaCo represent the mean of the two independent experiments shown. CT\_1: CETCH-TaCo experiment 1, CT\_2: CETCH-TaCo experiment 2, CT\_3: CETCH-TaCo experiment 2.

\* The rate is based on the concentration of TaCo enzymes. n/a - not applicable.

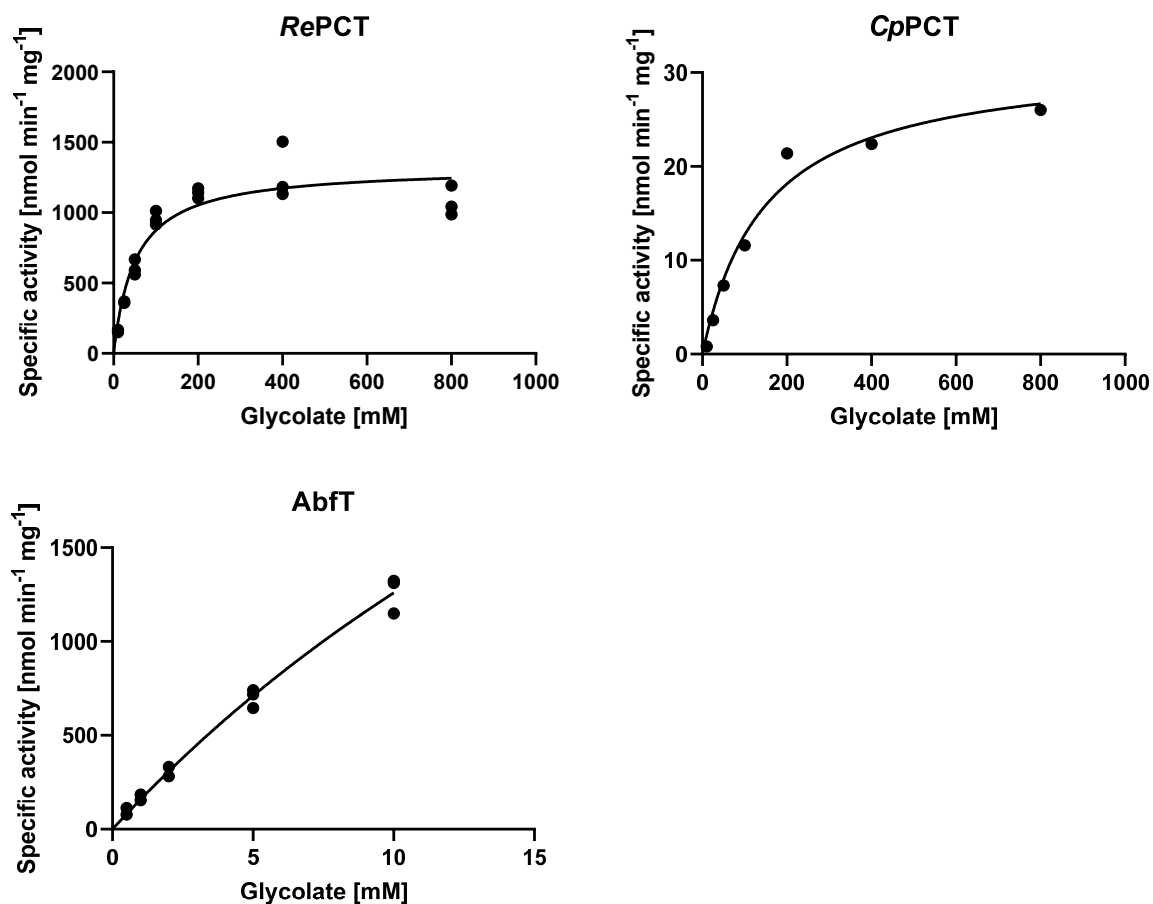

**Supplementary Figure 21. Michaelis-Menten kinetics of different acyl-CoA transferases.** *RePCT*: propionyl-CoA transferase of *Ralstonia eutropha*, *CpPCT*: propionyl-CoA transferase of *Clostridium propionicum*, *AbfT*: 4-OH-butyryl-CoA transferase of *Clostridium aminobutyricum*. Each data point for n=3 (n=1 for *CpPCT*) independent measurements is shown. The data were analysed using nonlinear regression.

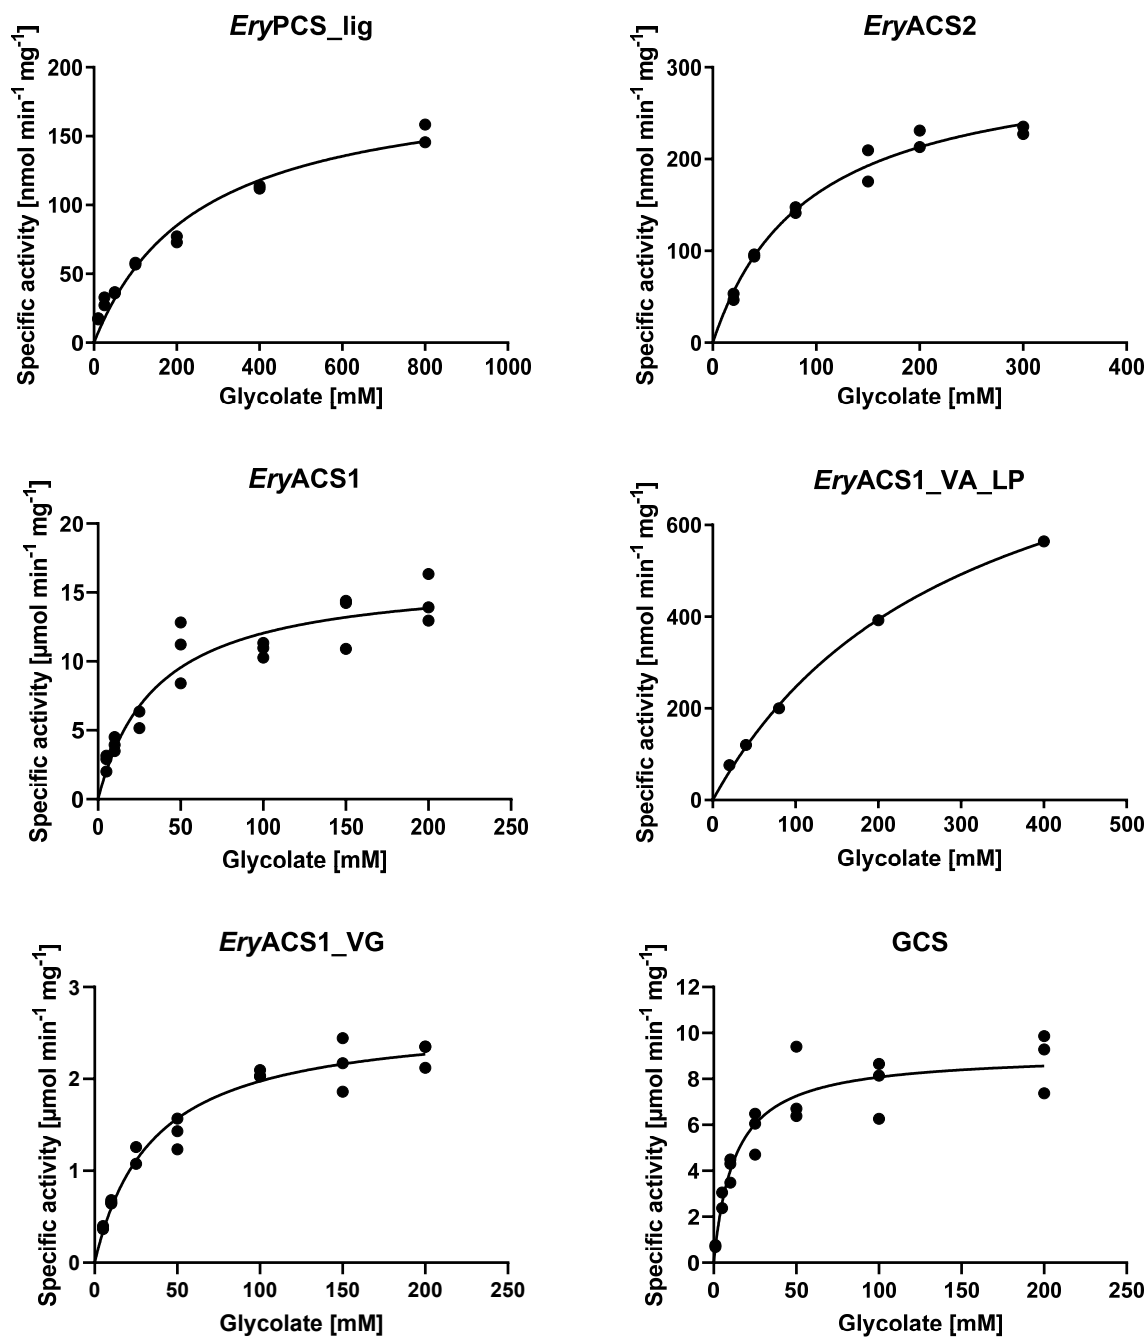

**Supplementary Figure 22. Michaelis-Menten kinetics of different acyl-CoA synthetases.** *EryPCS\_lig*: ligase domain of propionyl-CoA synthase from *Erythrobacter* sp. NAP1, *EryACS2*: acetyl-CoA synthetase 2 from *Erythrobacter* sp. NAP1, *EryACS1*: acetyl-CoA synthetase 1 from *Erythrobacter* sp. NAP1, *EryACS1\_VA\_LP*: acetyl-CoA synthetase 1 from *Erythrobacter* sp. NAP1 with two mutations (V379A and L641P), *EryACS1\_VG*: acetyl-CoA synthetase 1 from *Erythrobacter* sp. NAP1 with V379G mutation, *GCS*: acetyl-CoA synthetase 1 from *Erythrobacter* sp. NAP1 with V379A mutation. Each data point for for n=3 independent measurements (*EryACS1*, *EryACS1\_VG*, *GCS*), n=2 independent measurements (*EryPCS\_lig*, *EryACS2*) or a single measurement (n=1, *EryACS1\_VA\_LP*) is shown. The data were analysed using nonlinear regression.

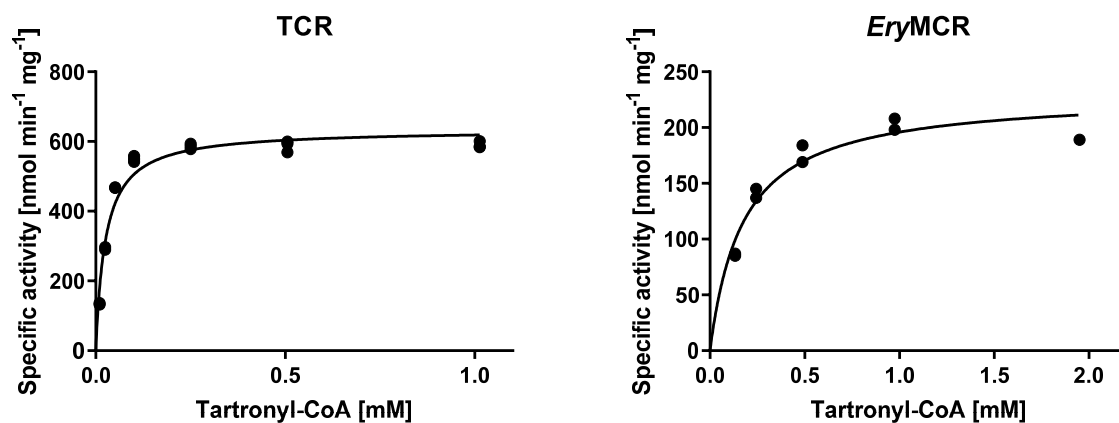

**Supplementary Figure 23. Michaelis-Menten kinetics of tartronyl-CoA reduction by two tested isoenzymes of malonyl-CoA reductases.** *CaMCR/TCR*: malonyl-CoA reductase of *C. aurantiacus*. *EryMCR*: malonyl-CoA reductase of *Erythrobacter sp.* NAP1. Each data point for  $n=3$  (TCR) or  $n=2$  independent measurements (*EryMCR*) is shown. The data were analysed using nonlinear regression.



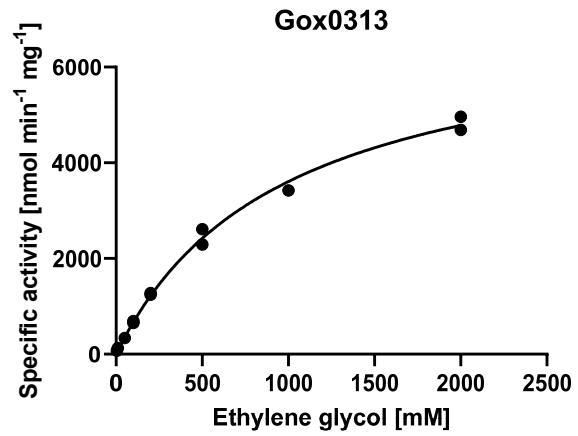

Supplementary Figure 24. Michaelis-Menten kinetics of alcohol dehydrogenase Gox0313 from *Gluconobacter oxydans*. Each data point for n=2 independent measurements is shown. The data were analysed using nonlinear regression.

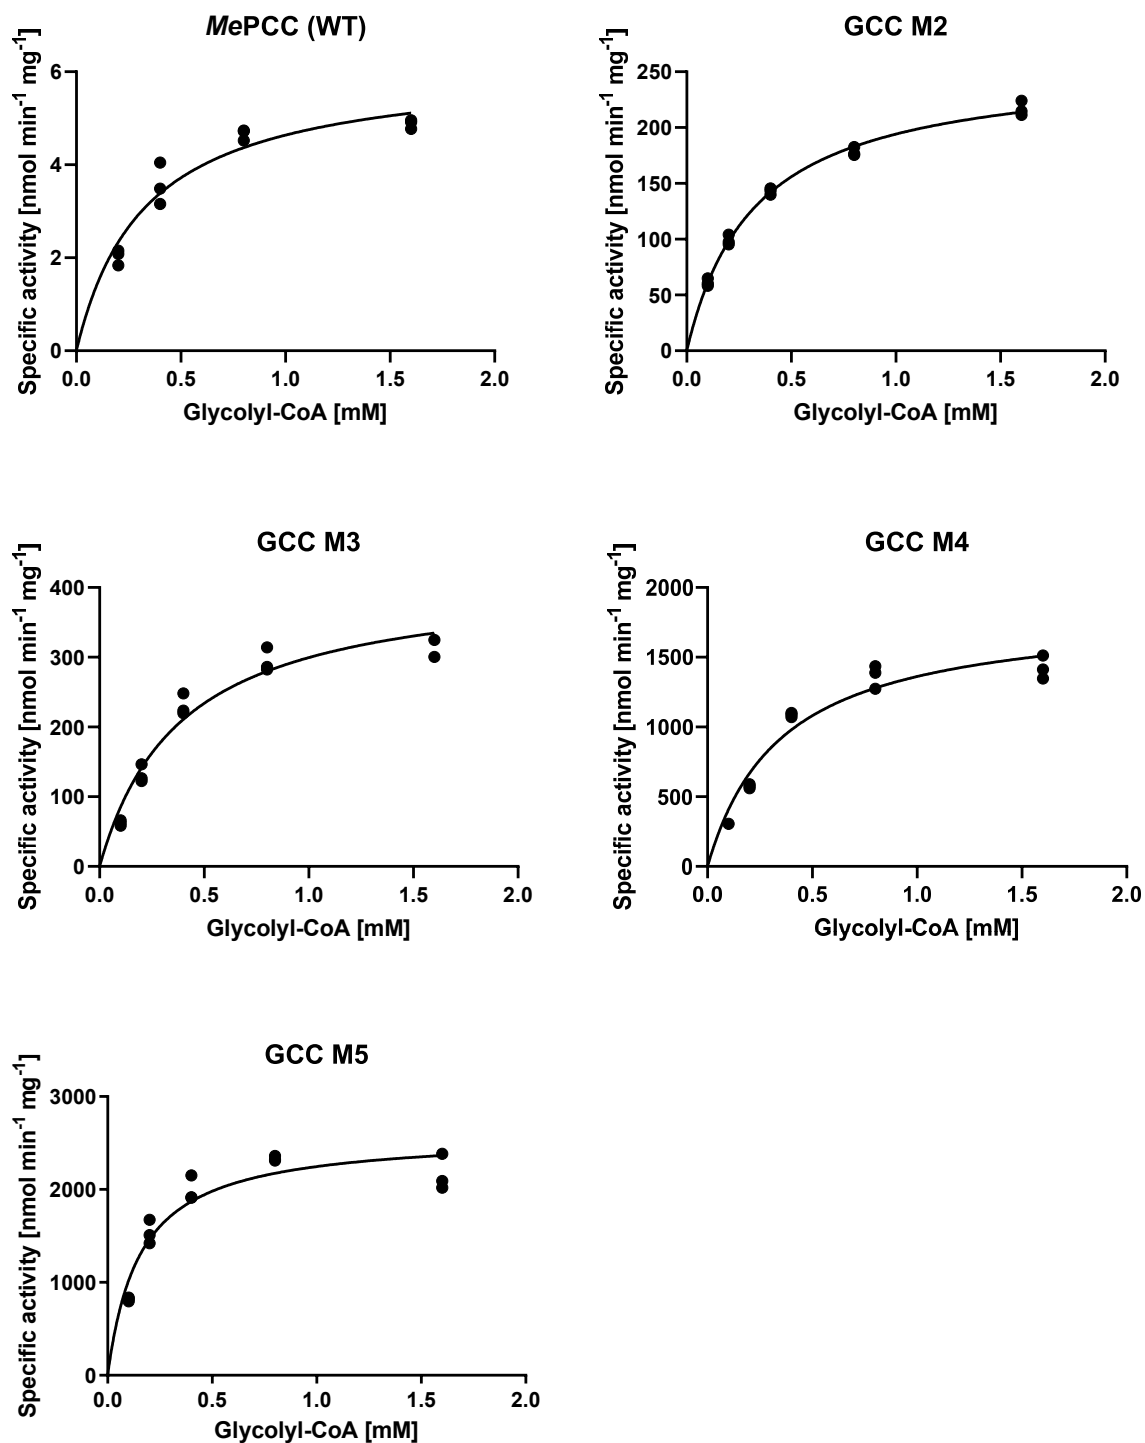

**Supplementary Figure 25. Michaelis-Menten kinetics of glycolyl-CoA carboxylation.** *MePCC* (WT): propionyl-CoA carboxylase of *Methylorubrum extorquens* AM1, GCC M2: *MePCC* with Y143H and D407I mutations, GCC M3: *MePCC* with L100S, Y143H and D407I mutations, GCC M4: *MePCC* with L100S, Y143H, D407I and I450V mutations, GCC M5: *MePCC* with L100S, Y143H, D407I, I450V and W502R mutations. Each data point for n=3 independent measurements is shown. The data were analysed using nonlinear regression.

## Supplementary Tables

Supplementary Table 1. Enzymes characterized in this study.

| Reaction            | Abbr.                       | mutation(s)                                      | Full name                            | Organism                                          | $V_{max}$<br>[nmol min <sup>-1</sup><br>mg <sup>-1</sup> ] | app. $K_M$<br>[mM]            | $k_{cat}/K_M$<br>[M <sup>-1</sup> s <sup>-1</sup> ] |
|---------------------|-----------------------------|--------------------------------------------------|--------------------------------------|---------------------------------------------------|------------------------------------------------------------|-------------------------------|-----------------------------------------------------|
| glycolate<br>→ gCoA | CpPCT                       | n/a                                              | Propionate<br>CoA<br>transferase     | <i>Clostridium<br/>propionicum</i>                | 32 ± 3                                                     | 149 ± 35<br>(glycolate)       | 0.2                                                 |
| glycolate<br>→ gCoA | RePCT                       | n/a                                              | propionate CoA<br>transferase        | <i>Ralstonia<br/>eutropha</i>                     | 1,300 ± 70                                                 | 52 ± 10<br>(glycolate)        | 25                                                  |
| glycolate<br>→ gCoA | AbfT                        | n/a                                              | 4-OH-butyrate<br>CoA<br>transferase  | <i>Clostridium<br/>aminobutyricum</i>             | 5,500 ±<br>1,500                                           | 34 ± 11<br>(glycolate)        | 129                                                 |
| glycolate<br>→ gCoA | EryPCS_lig                  | n/a                                              | ligase domain<br>of pCoA<br>synthase | <i>Erythrobacter</i> sp.<br>NAP1                  | 192 ± 14                                                   | 252 ± 45<br>(glycolate)       | 1.3                                                 |
| glycolate<br>→ gCoA | EryACS2                     | n/a                                              | acyl-CoA<br>synthetase               | <i>Erythrobacter</i> sp.<br>NAP1                  | 311 ± 16                                                   | 92 ± 12<br>(glycolate)        | 4                                                   |
| glycolate<br>→ gCoA | EryACS1                     | n/a                                              | acyl-CoA<br>synthetase               | <i>Erythrobacter</i> sp.<br>NAP1                  | 450 ± 10                                                   | 30 ± 2<br>(glycolate)         | 20                                                  |
| glycolate<br>→ gCoA | EryACS1*                    | n/a                                              | acyl-CoA<br>synthetase               | <i>Erythrobacter</i> sp.<br>NAP1                  | 16,320 ±<br>1116                                           | 35 ± 8<br>(glycolate)         | 567                                                 |
| glycolate<br>→ gCoA | EryACS1_VA_LP               | V379A, L641P                                     | acyl-CoA<br>synthetase               | <i>Erythrobacter</i> sp.<br>NAP1                  | 984 ± 54                                                   | 300 ± 30<br>(glycolate)       | 4                                                   |
| glycolate<br>→ gCoA | <b>EryACS1_VA*,<br/>GCS</b> | <b>V379A</b>                                     | <b>acyl-CoA<br/>synthetase</b>       | <b><i>Erythrobacter</i><br/>sp. NAP1</b>          | <b>9,111 ± 508</b>                                         | <b>13 ± 3<br/>(glycolate)</b> | <b>853</b>                                          |
| glycolate<br>→ gCoA | EryACS1_VG*                 | V379G                                            | acyl-CoA<br>synthetase               | <i>Erythrobacter</i> sp.<br>NAP1                  | 2,666 ± 111                                                | 35 ± 5<br>(glycolate)         | 89                                                  |
| glycolate<br>→ gCoA | EryACS1_VS*                 | V379S                                            | acyl-CoA<br>synthetase               | <i>Erythrobacter</i> sp.<br>NAP1                  | not<br>detectable                                          | n/a                           | n/a                                                 |
| gCoA<br>→ tCoA      | CaPCC1                      | n/a                                              | propionyl-CoA<br>carboxylase         | <i>Chloroflexus<br/>aurantiacus</i>               | not<br>detectable                                          | n/a                           | n/a                                                 |
| gCoA<br>→ tCoA      | CaPCC2                      | n/a                                              | propionyl-CoA<br>carboxylase         | <i>Chloroflexus<br/>aurantiacus</i>               | not<br>detectable                                          | n/a                           | n/a                                                 |
| gCoA<br>→ tCoA      | EryPCC                      | n/a                                              | propionyl-CoA<br>carboxylase         | <i>Erythrobacter</i> sp.<br>NAP1                  | not<br>detectable                                          | n/a                           | n/a                                                 |
| gCoA<br>→ tCoA      | MePCC <sup>‡</sup>          | n/a                                              | propionyl-CoA<br>carboxylase         | <i>Methylobacterium<br/>extorquens</i> AM1        | 6 ± 0.4                                                    | 0.33 ± 0.06<br>(gCoA)         | 41                                                  |
| gCoA<br>→ tCoA      | MePCC_DI                    | D407I                                            | propionyl-CoA<br>carboxylase         | <i>Methylobacterium<br/>extorquens</i> AM1        | 30 <sup>†</sup>                                            | n/a                           | n/a                                                 |
| gCoA<br>→ tCoA      | MePCC_DK                    | D407K                                            | propionyl-CoA<br>carboxylase         | <i>Methylobacterium<br/>extorquens</i> AM1        | instable<br>complex                                        | n/a                           | n/a                                                 |
| gCoA<br>→ tCoA      | MePCC_GA                    | G170A                                            | propionyl-CoA<br>carboxylase         | <i>Methylobacterium<br/>extorquens</i> AM1        | not<br>detectable                                          | n/a                           | n/a                                                 |
| gCoA<br>→ tCoA      | MePCC_GS                    | G170S                                            | propionyl-CoA<br>carboxylase         | <i>Methylobacterium<br/>extorquens</i> AM1        | not<br>detectable                                          | n/a                           | n/a                                                 |
| gCoA<br>→ tCoA      | MePCC_GT                    | G170T                                            | propionyl-CoA<br>carboxylase         | <i>Methylobacterium<br/>extorquens</i> AM1        | not<br>detectable                                          | n/a                           | n/a                                                 |
| gCoA<br>→ tCoA      | MePCC_LD                    | L140D                                            | propionyl-CoA<br>carboxylase         | <i>Methylobacterium<br/>extorquens</i> AM1        | not<br>detectable                                          | n/a                           | n/a                                                 |
| gCoA<br>→ tCoA      | MePCC_LN                    | L140N                                            | propionyl-CoA<br>carboxylase         | <i>Methylobacterium<br/>extorquens</i> AM1        | not<br>detectable                                          | n/a                           | n/a                                                 |
| gCoA<br>→ tCoA      | MePCC_YE                    | Y143E                                            | propionyl-CoA<br>carboxylase         | <i>Methylobacterium<br/>extorquens</i> AM1        | not<br>detectable                                          | n/a                           | n/a                                                 |
| gCoA<br>→ tCoA      | MePCC_YH                    | Y143H                                            | propionyl-CoA<br>carboxylase         | <i>Methylobacterium<br/>extorquens</i> AM1        | 20                                                         | n/a                           | n/a                                                 |
| gCoA<br>→ tCoA      | MePCC_YQ                    | Y143Q                                            | propionyl-CoA<br>carboxylase         | <i>Methylobacterium<br/>extorquens</i> AM1        | not<br>detectable                                          | n/a                           | n/a                                                 |
| gCoA<br>→ tCoA      | GCC M2 <sup>‡</sup>         | Y143H, D407I                                     | glycolyl-CoA<br>carboxylase          | <i>Methylobacterium<br/>extorquens</i> AM1        | 257 ± 5                                                    | 0.33 ± 0.02<br>(gCoA)         | 1,687                                               |
| gCoA<br>→ tCoA      | GCC_M2_LD                   | L100D, Y143H,<br>D407I                           | glycolyl-CoA<br>carboxylase          | <i>Methylobacterium<br/>extorquens</i> AM1        | not<br>detectable                                          | n/a                           | n/a                                                 |
| gCoA<br>→ tCoA      | GCC_M2_LN                   | L100N, Y143H,<br>D407I                           | glycolyl-CoA<br>carboxylase          | <i>Methylobacterium<br/>extorquens</i> AM1        | 41                                                         | n/a                           | n/a                                                 |
| gCoA<br>→ tCoA      | GCC M3 <sup>‡</sup>         | L100S, Y143H,<br>D407I                           | glycolyl-CoA<br>carboxylase          | <i>Methylobacterium<br/>extorquens</i> AM1        | 416 ± 28                                                   | 0.39 ± 0.07<br>(gCoA)         | 2,310                                               |
| gCoA<br>→ tCoA      | GCC_M3_DA                   | L100S, Y143H,<br>D171A, D407I                    | glycolyl-CoA<br>carboxylase          | <i>Methylobacterium<br/>extorquens</i> AM1        | instable<br>complex                                        | n/a                           | n/a                                                 |
| gCoA<br>→ tCoA      | GCC_M3_DV                   | L100S, Y143H,<br>D171V, D407I                    | glycolyl-CoA<br>carboxylase          | <i>Methylobacterium<br/>extorquens</i> AM1        | not<br>detectable                                          | n/a                           | n/a                                                 |
| gCoA<br>→ tCoA      | <b>GCC M4<sup>‡</sup></b>   | <b>L100S, Y143H,<br/>D407I, I450V</b>            | <b>glycolyl-CoA<br/>carboxylase</b>  | <b><i>Methylobacterium<br/>extorquens</i> AM1</b> | <b>1,841 ± 117</b>                                         | <b>0.35 ± 0.06<br/>(gCoA)</b> | <b>11,387</b>                                       |
| gCoA<br>→ tCoA      | <b>GCC M5<sup>‡</sup></b>   | <b>L100S, Y143H,<br/>D407I, I450V,<br/>W502R</b> | <b>glycolyl-CoA<br/>carboxylase</b>  | <b><i>Methylobacterium<br/>extorquens</i> AM1</b> | <b>2,590 ± 130</b>                                         | <b>0.15 ± 0.03<br/>(gCoA)</b> | <b>36,275</b>                                       |
| tCoA<br>→ glycerate | CaMCR, TCR                  | n/a                                              | tartronyl-CoA<br>reductase           | <i>Chloroflexus<br/>aurantiacus</i>               | 635 ± 14                                                   | 0.026 ±<br>0.003<br>(tCoA)    | 54,170                                              |

| Reaction                    | Abbr.   | mutation(s) | Full name                  | Organism                               | $v_{\max}$<br>[nmol min <sup>-1</sup><br>mg <sup>-1</sup> ] | app. $K_M$<br>[mM]    | $k_{\text{cat}}/K_M$<br>[M <sup>-1</sup> s <sup>-1</sup> ] |
|-----------------------------|---------|-------------|----------------------------|----------------------------------------|-------------------------------------------------------------|-----------------------|------------------------------------------------------------|
| <b>tCoA<br/>→ glycerate</b> | EryMCR  | n/a         | tartronyl-CoA<br>reductase | <i>Erythrobacter</i> sp.<br>NAP1       | 230 ± 13                                                    | 0.18 ± 0.04<br>(tCoA) | 2,787                                                      |
| <b>tCoA<br/>→ TSA</b>       | S†MCR   | n/a         | malonyl-CoA<br>reductase   | <i>Sulfolobus</i><br><i>tokodaii</i>   | 140 <sup>†</sup>                                            | n/a                   | n/a                                                        |
| <b>EG<br/>→ GA</b>          | Gox0313 | n/a         | alcohol<br>dehydrogenase   | <i>Gluconobacter</i><br><i>oxydans</i> | 7086 ± 284                                                  | 964 ± 84<br>(EG)      | 4.7                                                        |

Michaelis-Menten kinetic plots of all characterized enzymes can be found in Supplementary Figures 21-25. Data for  $v_{\max}$  and app.  $K_M$  represent mean ± SD determined from  $n \geq 6$  independent measurements using nonlinear regression. Enzymes in bold represent the enzyme variants used in the final TaCo pathway. n/a not applicable. \*expressed in *E. coli* BL21 AI  $\Delta patZ$ . <sup>†</sup> measured PK/LDH coupled. <sup>‡</sup> coexpressed with *M. extorquens* biotin ligase birA. <sup>1</sup> measured at 1 mM tartronyl-CoA.

gCoA: glycolyl-CoA, TSA: tartronic semialdehyde, tCoA: tartronyl-CoA, EG: ethylene glycol, GA: glycolaldehyde

**Supplementary Table 2. Data collection, refinement, and model statistics.**

|                                        | <b>MePCC</b>             | <b>GCC-M5</b>         |
|----------------------------------------|--------------------------|-----------------------|
| <b>Data collection</b>                 |                          |                       |
| Microscope                             | Glacios                  | Titan Krios G3        |
| Camera                                 | K2                       | K3 (CDS)              |
| Magnification                          | 36.000 x                 | 105.000 x             |
| Voltage (kV)                           | 200                      | 300                   |
| Electron exposure (e-/Å <sup>2</sup> ) | 50.2                     | 55.0                  |
| Defocus range (µm)                     | 0.5-3.5                  | 0.5-2.7               |
| Pixel size (Å)                         | 1.18                     | 0.851                 |
| <b>Image processing</b>                |                          |                       |
| Symmetry imposed                       | C1                       | C1                    |
| Initial particle images (no.)          | 168.488                  | 5.398.283             |
| Final particle images (no.)            | 77.714                   | 2.181.317             |
| Applied B-factor (Å <sup>2</sup> )     | -86.6                    | -71.7                 |
| Final resolution (Å)                   | 3.48                     | 1.96                  |
| <b>Refinement Statistics</b>           |                          |                       |
| Modeling software                      | COOT, Phenix             | COOT, Phenix          |
| Protein residues                       | 4702                     | 4289                  |
| Ligands                                | 6× CoA, 6× biotin        | 6× CoA, 6× biotin     |
| Water                                  | -                        | 871                   |
| Map CC (volume)                        | 0.83                     | 0.86                  |
| RMS deviations                         |                          |                       |
| Bond lengths (Å)                       | 0.008                    | 0.007                 |
| Bond angles (°)                        | 0.761                    | 0.972                 |
| ADP (B-factors)                        |                          |                       |
| min / max / mean                       |                          |                       |
| Protein                                | 50.92 / 184.73 / 99.60   | 3.64 / 71.26 / 24.93  |
| Ligand                                 | 102.25 / 136.29 / 124.46 | 30.41 / 40.40 / 36.62 |
| Water                                  | -                        | 5.86 / 29.25 / 11.77  |
| Ramachandran plot (%)                  |                          |                       |
| Outliers                               | 0.00                     | 0.00                  |
| Allowed                                | 6.36                     | 2.70                  |
| Favored                                | 93.64                    | 97.30                 |
| Rotamer outliers (%)                   | 0.00                     | 0.00                  |
| MolProbity score                       | 1.85                     | 1.11                  |
| Clash score                            | 7.95                     | 2.07                  |
| Resolution (Å) at FSC of 0.143         |                          |                       |
| masked / unmasked                      | 3.44 / 3.48              | 1.94 / 1.95           |
| <b>PDB Accession</b>                   |                          |                       |
|                                        | <b>6YBP</b>              | <b>6YBQ</b>           |
| <b>EMDB Accession</b>                  |                          |                       |
|                                        | <b>EMD-10770</b>         | <b>EMD-10771</b>      |

**Supplementary Table 3. Kinetic parameters of different glycolyl-CoA carboxylase variants.**

|           | $k_{\text{cat}}$<br>[s <sup>-1</sup> ] | app. $K_M$<br>[mM] | $k_{\text{cat}}/K_M$<br>[M <sup>-1</sup> s <sup>-1</sup> ] | $k_{\text{cat}}$<br>[s <sup>-1</sup> ] | app. $K_M$<br>[mM] | $k_{\text{cat}}/K_M$<br>[M <sup>-1</sup> s <sup>-1</sup> ] |
|-----------|----------------------------------------|--------------------|------------------------------------------------------------|----------------------------------------|--------------------|------------------------------------------------------------|
|           | glycolyl-CoA                           |                    |                                                            | propionyl-CoA                          |                    |                                                            |
| <b>WT</b> | 0.013 ± 0.001                          | 0.33 ± 0.06        | 40.7                                                       | 26.2 ± 1.9                             | 0.24 ± 0.04        | 1.09 × 10 <sup>5</sup>                                     |
| <b>M2</b> | 0.56 ± 0.01                            | 0.33 ± 0.02        | 1.71 × 10 <sup>3</sup>                                     | 0.1 ± 0.002                            | 0.42 ± 0.03        | 2.36 × 10 <sup>2</sup>                                     |
| <b>M3</b> | 0.9 ± 0.1                              | 0.39 ± 0.07        | 2.31 × 10 <sup>3</sup>                                     | 0.2 ± 0.01                             | 0.44 ± 0.06        | 5.17 × 10 <sup>2</sup>                                     |
| <b>M4</b> | 4.0 ± 0.3                              | 0.35 ± 0.06        | 1.13 × 10 <sup>4</sup>                                     | 1.1 ± 0.04                             | 0.45 ± 0.05        | 2.49 × 10 <sup>3</sup>                                     |
| <b>M5</b> | 5.6 ± 0.3                              | 0.15 ± 0.03        | 3.62 × 10 <sup>4</sup>                                     | 11.9 ± 0.4                             | 0.18 ± 0.02        | 6.63 × 10 <sup>4</sup>                                     |

Data for  $k_{\text{cat}}$  and app.  $K_M$  represent mean ± SD determined from n=18 independent measurements using nonlinear regression.

**Supplementary Table 4. Comparison of different natural and synthetic photorespiratory bypasses.**

|                                                              | NPR                                     | GLC <sup>19</sup>          | OX <sup>20</sup>           | A5P <sup>1</sup>            | 3OHP <sup>22</sup>          | TACO                        |
|--------------------------------------------------------------|-----------------------------------------|----------------------------|----------------------------|-----------------------------|-----------------------------|-----------------------------|
| CO <sub>2</sub> release                                      | yes                                     | yes                        | yes                        | no                          | no                          | no                          |
| Place of CO <sub>2</sub> release                             | mitochondria (far RuBisCO)              | chloroplast (near RuBisCO) | chloroplast (near RuBisCO) | no CO <sub>2</sub> released | no CO <sub>2</sub> released | no CO <sub>2</sub> released |
| Carbon efficiency <sup>‡</sup>                               | 75%                                     | 75%                        | 0%                         | 100%                        | 150%                        | 150%                        |
| Way of CO <sub>2</sub> -re-fixation                          | complete CBB cycle                      | complete CBB cycle         | complete CBB cycle         | part of CBB cycle           | Included in bypass          | Included in bypass          |
| NH <sub>3</sub> release                                      | yes                                     | no                         | no                         | no                          | no                          | no                          |
| no. of enzymes needed                                        | 11                                      | 5                          | 6                          | 5                           | 12                          | 5                           |
| <b>Turns of Calvin cycle</b>                                 | <b>4.8</b>                              | <b>4.8</b>                 | <b>12</b>                  | <b>4</b>                    | <b>3</b>                    | <b>3</b>                    |
| <b>No. of RuBisCO carboxylation (75%)/ oxygenation (25%)</b> | <b>3.6/ 1.2</b>                         | <b>3.6/ 1.2</b>            | <b>9/ 3</b>                | <b>3/ 1</b>                 | <b>2.25/ 0.75</b>           | <b>2.25/ 0.75</b>           |
| <b>ATP consumed</b>                                          | <b>14</b>                               | <b>13.4</b>                | <b>32</b>                  | <b>12</b>                   | <b>11.75</b>                | <b>11 / 13.8*</b>           |
| <b>Redox power consumed</b>                                  | <b>8 NAD(P)H + 1.2 Fd<sub>red</sub></b> | <b>7.4 NAD(P)H</b>         | <b>14 NAD(P)H</b>          | <b>7 NAD(P)H</b>            | <b>6.5 NAD(P)H</b>          | <b>6.5 NAD(P)H</b>          |

The values in the last four rows (in bold) were calculated from flux balance analysis (FBA) and are based on the net fixation of three CO<sub>2</sub> and formation of one 3-PGA.

NPR: Natural (canonical) photorespiration, GLC: glycerate bypass, OX: glycolate oxidation pathway, A5P: arabinose-5-phosphate shunt, 3OHP: 3-hydroxypropionate bypass, TACO: tartronyl-CoA pathway

\* The values include the unfruitful ATP hydrolysis of the GCC M5 variant.

‡ Carbon efficiency relates to one complete turn of each of the photorespiratory pathways. For the calculations, we assumed that natural (canonical) photorespiration, the glycerate bypass and the glycolate pathway start with 2 molecules of 2-phosphoglycolate (i.e. with two oxygenation events), while the arabinose-5-phosphate shunt, the 3-OH-propionate bypass and the tartronyl-CoA pathway start with 1 molecule of 2-phosphoglycolate (i.e. with one oxygenation event).

**Supplementary Table 5. Comparison of energy and carbon efficiencies of the CETCH cycle coupled with the glycerate pathway or the TaCo pathway.**

|                                     | <b>CETCH (v5.4) <sup>6</sup><br/>+ glycerate pathway</b> | <b>CETCH (v5.4)<br/>+ TaCo</b> |
|-------------------------------------|----------------------------------------------------------|--------------------------------|
| CO <sub>2</sub> fixed (per 3-PGA)   | 4                                                        | 3                              |
| CO <sub>2</sub> release (per 3-PGA) | 1                                                        | 0                              |
| <b>Carbon efficiency</b>            | <b>75%</b>                                               | <b>100%</b>                    |
| turns of CETCH required (per 3-PGA) | 2                                                        | 1                              |
| ATP consumed                        | 3                                                        | 5                              |
| Redox power consumed                | 9 NAD(P)H                                                | 7 NAD(P)H                      |

The values correspond to the formation of 3-phosphoglycerate (3-PGA).



**Supplementary Table 6. Primers used in this study**

| <b>name</b>              | <b>sequence (5' → 3')</b>                                                     |
|--------------------------|-------------------------------------------------------------------------------|
| <b>ACS_E_L641P</b>       | CGGACCCGTCCTCTGGTGGATCGTCCGATTGAGGGCCGTCAG                                    |
| <b>ACS_Ery_V379A</b>     | CTGCGTCTGCTGGGCTCTGTAGGTGAGCCGATCAAC                                          |
| <b>ACS_Ery_V379G</b>     | CCCTGCGTCTGCTGGGCTCTGGAGGTGAGCCGATCAAC                                        |
| <b>ACS_Ery_V379S</b>     | GTTCCCTGCGTCTGCTGGGCTCTTCAGGTGAGCCGATCAAC                                     |
| <b>BirA_Me_bb_for</b>    | TATAGAATTTCAGATCTAGGAGATATACATATGCAGTTCCG                                     |
| <b>BirA_Me_bb_rev</b>    | TATACTCGAGGGATCCCTATCCAGTCTCAGGCCG                                            |
| <b>BirA_Me_EcoRI_mut</b> | CTGCTCGAATTTCTGTGCGGAAC                                                       |
| <b>MC60</b>              | TGCACCATATGTCGAGTCCAAAGATCCG                                                  |
| <b>MC61</b>              | CTGACGGTACCTGCGACTAGTTCATTTATGGGAAGATTGGCAACG                                 |
| <b>patZ_KO_fw</b>        | GAACAGTTAGAAAGCGTTTAAAAATCATTCCGGTCACTTCTGCGGGAGACCCGGTAATTAACCCTCACTAAAGGGCG |
| <b>patZ_KO_rv</b>        | CAATAATAACACCAGTCCCATTAAAGTGGTCAACATTTCCAGTACCTTACTAATACGACTCACTATAGGGGTC     |
| <b>PCC_G170A</b>         | CGTGCGCGGGCGCCGACGTGTACTCGCCG                                                 |
| <b>PCC_G170S</b>         | CGTGCGCGGGCAGCGACGTGTACTCGC                                                   |
| <b>PCC_G170T</b>         | CGTGCGCGGGCACCAGGTGTACTCGC                                                    |
| <b>PCC_L100D</b>         | GTTCCGGCGGCTCGGACTCCGAGGCGCACGCAG                                             |
| <b>PCC_L100N</b>         | GTTCCGGCGGCTCGAACTCCGAGGCGCACGCAG                                             |
| <b>PCC_L100S</b>         | GTTCCGGCGGCTCGTCCCTCCGAGGCGCACGCAG                                            |
| <b>PCC_Y143H</b>         | GCGCTCGGCGGCCACGGCAGGTGTTCCGC                                                 |
| <b>PccB_fw_P1</b>        | GTTTAACTTTAATAAGGAGATATACCATGGGCAGCAGCCATC                                    |
| <b>PccB_rv_P1</b>        | GATTACTTTCTGTTCGACTTAAGCATTATGCGGCCGCAAG                                      |
| <b>PCCMe_D171A</b>       | CGTGCGCGGGCGGCGCGTGTACTCGC                                                    |
| <b>PCCMe_D171V</b>       | CGTGCGCGGGCGGCGTGTGTACTCGC                                                    |
| <b>PCCtoACC_D407I</b>    | CAAGGCCTTCGGCGGCGCCTACATCGTCATGGCCTCCAAGCATG                                  |
| <b>PCCtoGCC_D407K</b>    | CAAGGCCTTCGGCGGCGCCTACAAAGTCATGGCCTCCAAGCATG                                  |
| <b>PCCtoGCC_L140D</b>    | GAGGGCGTGGCCCGGACGGCGGCTACGGC                                                 |
| <b>PCCtoGCC_L140N</b>    | GAGGGCGTGGCCCGGAACGGCGGCTACGGC                                                |
| <b>PCCtoGCC_Y143E</b>    | CGCGCTCGGCGGCGAAGGCGAGGTGTTCCGCGG                                             |
| <b>PCCtoGCC_Y143Q</b>    | CGCGCTCGGCGGCGCAAGGCGAGGTGTTCCGCGG                                            |
| <b>pET16b_NcoI2Ndel</b>  | CTTTAAGAAGGAGATATACATATGGCCATCATCATCATC                                       |

**Supplementary Table 7. List of plasmids for heterologous expression.**

| abbreviation           | full name                               | source organism                        | mutation(s)                       | plasmid            | GenBank accession no.          | reference         |
|------------------------|-----------------------------------------|----------------------------------------|-----------------------------------|--------------------|--------------------------------|-------------------|
| <b>AbfT</b>            | 4-hydroxybutyrate CoA transferase       | <i>Clostridium aminobutyricum</i>      | n/a                               | pTE1138            | CAB60036.2                     | this work         |
| <b>BirA</b>            | biotin ligase                           | <i>Methylobacterium extorquens</i> AM1 | n/a                               | pJZ152             | WP_003598178.1                 | this work         |
| <b>CaMCR, TCR</b>      | malonyl-CoA/tartronyl-CoA reductase     | <i>Chloroflexus aurantiacus</i>        | n/a                               | pTrc-McrCa         | WP_012258473.1                 | <sup>9</sup>      |
| <b>CaPCC1</b>          | propionyl-CoA carboxylase               | <i>Chloroflexus aurantiacus</i>        | n/a                               | pJZ95              | YP_001636422.1, YP_001635958.1 | this work         |
| <b>CaPCC2</b>          | methylcrotonyl-CoA carboxylase          | <i>Chloroflexus aurantiacus</i>        | n/a                               | pJZ96              | YP_001634995.1, YP_001635635.1 | this work         |
| <b>CpPCT</b>           | propionate CoA transferase              | <i>Clostridium propionicum</i>         | n/a                               | pET-16b_PCT        | CAB77207.1                     | <sup>26</sup>     |
| <b>Eno</b>             | enolase                                 | <i>Escherichia coli</i>                | n/a                               | pCA24N-eno         | APC52982.1                     | ASKA <sup>7</sup> |
| <b>EryACS1</b>         | acyl-CoA synthetase                     | <i>Erythrobacter</i> sp. NAP1          | n/a                               | pTE1007            | WP_007165025.1                 | this work         |
| <b>EryACS1_VA, GCS</b> | acyl-CoA synthetase                     | <i>Erythrobacter</i> sp. NAP1          | V379A                             | pTE1417            | n/a                            | this work         |
| <b>EryACS1_VA_LP</b>   | acyl-CoA synthetase                     | <i>Erythrobacter</i> sp. NAP1          | V379A, L641P                      | pTE1427            | n/a                            | this work         |
| <b>EryACS1_VG</b>      | acyl-CoA synthetase                     | <i>Erythrobacter</i> sp. NAP1          | V379G                             | pTE1434            | n/a                            | this work         |
| <b>EryACS1_VS</b>      | acyl-CoA synthetase                     | <i>Erythrobacter</i> sp. NAP1          | V379S                             | pTE1418            | n/a                            | this work         |
| <b>EryACS2</b>         | acyl-CoA synthetase                     | <i>Erythrobacter</i> sp. NAP1          | n/a                               | pTE1008            | WP_007166279.1                 | this work         |
| <b>EryMCR</b>          | malonyl-CoA/tartronyl-CoA reductase     | <i>Erythrobacter</i> sp. NAP1          | n/a                               | pTE1010            | WP_007163680.1                 | this work         |
| <b>EryPCC</b>          | propionyl-CoA carboxylase               | <i>Erythrobacter</i> sp. NAP1          | n/a                               | pJZ151             | WP_007163953.1, WP_007163945.1 | this work         |
| <b>EryPCS_lig</b>      | ligase domain of propionyl-CoA synthase | <i>Erythrobacter</i> sp. NAP1          | n/a                               | pJZ26              | WP_007163681.1                 | this work         |
| <b>FucO</b>            | lactaldehyde reductase                  | <i>Escherichia coli</i>                | n/a                               | pCA24N-fucO        | WP_000013588.1                 | ASKA <sup>7</sup> |
| <b>GCC M2</b>          | glycolyl-CoA carboxylase                | <i>Methylobacterium extorquens</i> AM1 | Y143H, D407I                      | pJZ133             | n/a                            | this work         |
| <b>GCC M3</b>          | glycolyl-CoA carboxylase                | <i>Methylobacterium extorquens</i> AM1 | L100S, Y143H, D407I               | pTE1412            | n/a                            | this work         |
| <b>GCC M4</b>          | glycolyl-CoA carboxylase                | <i>Methylobacterium extorquens</i> AM1 | L100S, Y143H, D407I, I450V        | pTE3100            | n/a                            | this work         |
| <b>GCC M4</b>          | glycolyl-CoA carboxylase                | <i>Methylobacterium extorquens</i> AM1 | L100S, Y143H, D407I, I450V        | pTE3100            | n/a                            | this work         |
| <b>GCC M5</b>          | glycolyl-CoA carboxylase                | <i>Methylobacterium extorquens</i> AM1 | L100S, Y143H, D407I, I450V, W502R | pTE3101            | n/a                            | this work         |
| <b>GCC_M2_LD</b>       | glycolyl-CoA carboxylase                | <i>Methylobacterium extorquens</i> AM1 | L100D, Y143H, D407I               | pTE1411            | n/a                            | this work         |
| <b>GCC_M2_LN</b>       | glycolyl-CoA carboxylase                | <i>Methylobacterium extorquens</i> AM1 | L100N, Y143H, D407I               | pTE1413            | n/a                            | this work         |
| <b>GCC_M3_DA</b>       | glycolyl-CoA carboxylase                | <i>Methylobacterium extorquens</i> AM1 | L100S, Y143H, D171A, D407I        | pTE1422            | n/a                            | this work         |
| <b>GCC_M3_DV</b>       | glycolyl-CoA carboxylase                | <i>Methylobacterium extorquens</i> AM1 | L100S, Y143H, D171V, D407I        | pTE1425            | n/a                            | this work         |
| <b>GlxK</b>            | glycerate kinase                        | <i>Escherichia coli</i>                | n/a                               | pCA24N-glxK        | WP_062863124.1                 | ASKA <sup>7</sup> |
| <b>Gox0313</b>         | alcohol dehydrogenase                   | <i>Gluconobacter oxydans</i>           | n/a                               | pTE1453            | AAW60096.1                     | this work         |
| <b>Gox1801</b>         | succinic semialdehyde reductase         | <i>Gluconobacter oxydans</i>           | n/a                               | pTE1125            | WP_011253321.1                 | this work         |
| <b>Gpm</b>             | phosphoglycerate mutase                 | <i>Escherichia coli</i>                | n/a                               | pCA24N-gpml        | APC53800.1                     | ASKA <sup>7</sup> |
| <b>MatB</b>            | malonyl-CoA synthetase                  | <i>Rhizobium leguminosarum</i>         | n/a                               | pEMatB-nHis        | AAC83455.1                     | <sup>27</sup>     |
| <b>Myo</b>             | myokinase (adenylate kinase)            | <i>Escherichia coli</i>                | n/a                               | pCA24N-adk         | WP_127790717.1                 | ASKA <sup>7</sup> |
| <b>Nox</b>             | NADH Oxidase                            | <i>Lactobacillus pentosus</i>          | n/a                               | pET28a-NH-nox-L.p. | WP_050338260.1                 | <sup>28</sup>     |

| abbreviation   | full name                     | source organism                           | mutation(s) | plasmid       | GenBank accession no.          | reference         |
|----------------|-------------------------------|-------------------------------------------|-------------|---------------|--------------------------------|-------------------|
| <b>PCC</b>     | propionyl-CoA carboxylase     | <i>Methylobacterium extorquens</i> AM1    | n/a         | pTE615        | WP_003599287.1, WP_003597263.1 | <sup>6</sup>      |
| <b>PCC_DI</b>  | propionyl-CoA carboxylase     | <i>Methylobacterium extorquens</i> AM1    | D407I       | pJZ105        | n/a                            | this work         |
| <b>PCC_DK</b>  | propionyl-CoA carboxylase     | <i>Methylobacterium extorquens</i> AM1    | D407K       | pJZ103        | n/a                            | this work         |
| <b>PCC_GA</b>  | propionyl-CoA carboxylase     | <i>Methylobacterium extorquens</i> AM1    | G170A       | pJZ127        | n/a                            | this work         |
| <b>PCC_GS</b>  | propionyl-CoA carboxylase     | <i>Methylobacterium extorquens</i> AM1    | G170S       | pJZ117        | n/a                            | this work         |
| <b>PCC_GT</b>  | propionyl-CoA carboxylase     | <i>Methylobacterium extorquens</i> AM1    | G170T       | pJZ118        | n/a                            | this work         |
| <b>PCC_LD</b>  | propionyl-CoA carboxylase     | <i>Methylobacterium extorquens</i> AM1    | L140D       | pJZ99         | n/a                            | this work         |
| <b>PCC_LN</b>  | propionyl-CoA carboxylase     | <i>Methylobacterium extorquens</i> AM1    | L140N       | pJZ100        | n/a                            | this work         |
| <b>PCC_YE</b>  | propionyl-CoA carboxylase     | <i>Methylobacterium extorquens</i> AM1    | Y143E       | pJZ101        | n/a                            | this work         |
| <b>PCC_YH</b>  | propionyl-CoA carboxylase     | <i>Methylobacterium extorquens</i> AM1    | Y143H       | pJZ141        | n/a                            | this work         |
| <b>PCC_YQ</b>  | propionyl-CoA carboxylase     | <i>Methylobacterium extorquens</i> AM1    | Y143Q       | pJZ102        | n/a                            | this work         |
| <b>PduP</b>    | propionaldehyde dehydrogenase | <i>Rhodospseudomonas palustris</i> BisB18 | n/a         | pJZ73         | WP_041801450.1                 | <sup>29</sup>     |
| <b>Pgp</b>     | 2-PG phosphatase              | <i>Escherichia coli</i>                   | n/a         | pCA24N-gph    | APC54031.1                     | ASKA <sup>7</sup> |
| <b>PPK2-I</b>  | polyphosphate kinase          | <i>Sinorhizobium meliloti</i>             | n/a         | pET28a-SmPPK2 | n/a                            | <sup>16</sup>     |
| <b>PPK2-II</b> | polyphosphate kinase          | <i>Acinetobacter johnsonii</i>            | n/a         | pET28a-AjPPK2 | n/a                            | <sup>16</sup>     |
| <b>RePCT</b>   | propionate CoA transferase    | <i>Ralstonia eutropha</i>                 | n/a         | pET-19b::pct  | CAJ93797.1                     | <sup>30</sup>     |
| <b>CdSucD</b>  | succinyl-CoA reductase        | <i>Clostridioides difficile</i>           | n/a         | pTE1816       | WP_004454646                   | this work         |

n/a - not applicable, 2-PG: 2-phosphoglycolate

**Supplementary Table 8. Conditions for heterologous expression in *E. coli* and purification of enzymes.**

| Enzyme abbr.       | full name                                    | tag   | strain <sup>1</sup> | medium <sup>2</sup> | resistance <sup>3</sup> | induction               | expression | purification |
|--------------------|----------------------------------------------|-------|---------------------|---------------------|-------------------------|-------------------------|------------|--------------|
| <b>AbfT</b>        | 4-hydroxybutyrate CoA transferase            | His   | Rosetta             | GLB                 | Amp                     | 0.5 mM IPTG             | 25 °C O/N  | b            |
| <b>AKR7a2</b>      | succinic semialdehyde reductase              | His   | BL21                | TB                  | Amp                     | 0.25 mM IPTG            | 21 °C O/N  | e            |
| <b>CaMCR, TCR</b>  | malonyl-CoA/tartronyl-CoA reductase          | Strep | BL21                | GLB                 | Amp                     | 0.5 mM IPTG             | 25 °C 4h   | c            |
| <b>CaPCC1</b>      | propionyl-CoA carboxylase                    | His   | BL21 DE3            | GLB                 | Amp                     | 0.4 mM IPTG             | 37 °C 4h   | f            |
| <b>CaPCC2</b>      | propionyl-CoA carboxylase                    | His   | BL21 DE3            | GLB                 | Amp                     | 0.4 mM IPTG             | 37 °C 4h   | f            |
| <b>Ccr</b>         | Crotonyl-CoA carboxylase/reductase           | His   | BL21                | TB                  | Amp                     | 0.25 mM IPTG            | 21 °C O/N  | e            |
| <b>CdSudD</b>      | succinyl-CoA reductase                       | His   | Rosetta             | GLB                 | Spec                    | 0.5 mM IPTG             | 25 °C O/N  | b, e         |
| <b>CkSudD</b>      | succinyl-CoA reductase                       | His   | BL21                | TB                  | Spec                    | 0.25 mM IPTG            | 21 °C O/N  | e            |
| <b>CpPCT</b>       | propionate CoA transferase                   | His   | BL21                | TB                  | Amp                     | 0.5 mM IPTG             | 25 °C O/N  | a            |
| <b>Ecm</b>         | ethylmalonyl-CoA mutase                      | His   | BL21                | TB                  | Amp                     | 0.25 mM IPTG            | 21 °C O/N  | e            |
| <b>Epi</b>         | ethylmalonyl-CoA/methylmalonyl-CoA epimerase | His   | BL21                | TB                  | Amp                     | 0.25 mM IPTG            | 21 °C O/N  | e            |
| <b>EryACS, GCS</b> | acyl-CoA synthetase                          | His   | AI                  | TB                  | Amp                     | 0.5 mM IPTG             | 25 °C 4h   | a            |
| <b>EryACS, GCS</b> | acyl-CoA synthetase                          | His   | AI $\Delta$ patZ    | TB                  | Amp + Kan               | 0.5 mM IPTG + 0.02% ara | 25 °C 4h   | a            |
| <b>EryMCR</b>      | malonyl-CoA/tartronyl-CoA reductase          | Strep | BL21                | TB                  | Amp                     | 0.5 mM IPTG             | 25 °C O/N  | c            |
| <b>EryPCC</b>      | propionyl-CoA carboxylase                    | His   | BL21 DE3            | GLB                 | Spec                    | not induced             | 25 °C O/N  | a            |
| <b>EryPCS_lig</b>  | ligase domain of propionyl-CoA synthase      | His   | BL21                | TB                  | Amp                     | 0.5 mM IPTG             | 25 °C O/N  | a            |
| <b>Fdh</b>         | formate dehydrogenase (D221A)                | His   | BL21                | TB                  | Amp                     | 0.25 mM IPTG            | 21 °C O/N  | e            |
| <b>FucO</b>        | lactaldehyde reductase                       | His   | BL21                | TB                  | Cam                     | 0.5 mM IPTG             | 25 °C O/N  | a            |
| <b>GCC</b>         | glycolyl-CoA carboxylase                     | His   | BL21_BirA           | GLB <sup>4</sup>    | Spec + Amp              | 0.5 mM IPTG             | 25 °C O/N  | a            |
| <b>GlxK</b>        | glycerate kinase                             | His   | BL21                | TB                  | Cam                     | 0.5 mM IPTG             | 25 °C O/N  | a            |
| <b>Gox0313</b>     | alcohol dehydrogenase                        | His   | BL21                | TB                  | Amp                     | 0.5 mM IPTG             | 25 °C O/N  | a            |
| <b>Gox1801</b>     | succinic semialdehyde/glyoxylate reductase   | Strep | Rosetta             | GLB                 | Amp                     | 0.5 mM IPTG             | 25 °C O/N  | d            |
| <b>Gpm</b>         | phosphoglycerate mutase                      | His   | BL21                | TB                  | Cam                     | 0.5 mM IPTG             | 25 °C O/N  | a            |
| <b>KatE</b>        | katalase                                     | His   | BL21                | TB                  | Cam                     | 0.25 mM IPTG            | 21 °C O/N  | e            |
| <b>Mch</b>         | mesaconyl-CoA hydratase                      | His   | BL21                | TB                  | Amp                     | 0.25 mM IPTG            | 21 °C O/N  | e            |
| <b>Mcl1</b>        | $\beta$ -methylmalyl-CoA lyase               | His   | BL21                | TB                  | Amp                     | 0.25 mM IPTG            | 21 °C O/N  | e            |
| <b>Mcm</b>         | methylmalonyl-CoA mutase                     | His   | BL21                | TB                  | Amp                     | 0.25 mM IPTG            | 21 °C O/N  | e            |
| <b>Mco</b>         | methylsuccinyl-CoA oxidase                   | His   | Rosetta             | TB                  | Amp                     | 0.25 mM IPTG            | 21 °C O/N  | e            |
| <b>MePCC</b>       | propionyl-CoA carboxylase                    | His   | BL21_BirA           | GLB <sup>4</sup>    | Spec + Amp              | 0.5 mM IPTG             | 25 °C O/N  | a            |
| <b>Myo</b>         | myokinase (adenylate kinase)                 | His   | BL21                | TB                  | Cam                     | 0.5 mM IPTG             | 25 °C O/N  | a            |
| <b>Nmar0206</b>    | 4-hydroxybutyryl-CoA synthetase              | His   | BL21 GroES/GroEL    | TB                  | Amp                     | 0.25 mM IPTG            | 21 °C O/N  | e            |
| <b>Nmar0207</b>    | 4-hydroxybutyryl-CoA dehydrogenase           | His   | BL21                | TB <sup>5</sup>     | Amp                     | 0.25 mM IPTG            | 21 °C O/N  | e            |
| <b>Nox</b>         | NADH Oxidase                                 | His   | BL21                | GLB                 | Kan                     | 0.5 mM IPTG             | 25 °C O/N  | a            |
| <b>Pco</b>         | propionyl-CoA oxidase                        | His   | Rosetta             | TB                  | Amp                     | 0.25 mM IPTG            | 25 °C 4h   | e            |

| <b>Enzyme<br/>abbr.</b> | <b>full name</b>                 | <b>tag</b> | <b>strain<sup>1</sup></b> | <b>medium<sup>2</sup></b> | <b>resistance<sup>3</sup></b> | <b>induction</b> | <b>expression</b> | <b>purification</b> |
|-------------------------|----------------------------------|------------|---------------------------|---------------------------|-------------------------------|------------------|-------------------|---------------------|
| <b>PduP</b>             | propionaldehyde<br>dehydrogenase | Strep      | BL21                      | TB                        | Amp                           | not induced      | 25 °C O/N         | c                   |
| <b>Pgp</b>              | phosphoglycolate<br>phosphatase  | His        | BL21                      | TB                        | Cam                           | 0.5 mM<br>IPTG   | 25 °C O/N         | a                   |
| <b>Ppk2-I</b>           | polyphosphate kinase             | His        | BL21                      | TB                        | Kan                           | 0.25 mM<br>IPTG  | 21 °C O/N         | e                   |
| <b>Ppk2-II</b>          | polyphosphate kinase             | His        | BL21                      | TB                        | Kan                           | 0.25 mM<br>IPTG  | 21 °C O/N         | e                   |
| <b>RePCT</b>            | propionate CoA<br>transferase    | His        | BL21                      | TB                        | Amp                           | 0.5 mM<br>IPTG   | 25 °C O/N         | a                   |

<sup>1</sup> see text “Bacterial Strains” in Supplementary Materials and Methods for details

<sup>2</sup> TB: terrific broth (12 g L<sup>-1</sup> tryptone, 24 g L<sup>-1</sup> yeast extract, 0.4% glycerol, 17 mM KH<sub>2</sub>PO<sub>4</sub>, 72 mM K<sub>2</sub>HPO<sub>4</sub>),  
GLB: golden LB (LB medium with 0.4% glycerol, 17 mM KH<sub>2</sub>PO<sub>4</sub>, 72 mM K<sub>2</sub>HPO<sub>4</sub>)

<sup>3</sup> concentrations of antibiotics in medium: ampicillin (Amp) 100 µg mL<sup>-1</sup>, kanamycin (Kan) 50 µg mL<sup>-1</sup>,  
chloramphenicol (Cam) 34 µg mL<sup>-1</sup>, spectinomycin (Spec) 50 µg mL<sup>-1</sup>

<sup>4</sup> PCC/GCC medium contained 2 µg mL<sup>-1</sup> biotin

<sup>5</sup> Nmar0207 medium additives: 100 µM Fe(II)SO<sub>4</sub>, 100 µM Fe(III)citrate, 20 mM fumarate

## Supplementary References

1. Trudeau, D. L. *et al.* Design and in vitro realization of carbon-conserving photorespiration. *Proc. Natl. Acad. Sci. USA* **115**, E11455-E11464 (2018).
2. Peter, D. M., Vögeli, B., Cortina, N. S. & Erb, T. J. A Chemo-Enzymatic Road Map to the Synthesis of CoA Esters. *Molecules* **21**, 517 (2016).
3. Sambrook, J. F. & Russell, D. W. *Molecular Cloning: A Laboratory Manual*. 3rd edn, (Cold Spring Harbor Laboratory Press, New York, 2001).
4. Shenoy, A. R. & Visweswariah, S. S. Site-directed mutagenesis using a single mutagenic oligonucleotide and DpnI digestion of template DNA. *Anal. Biochem.* **319**, 335-336 (2003).
5. Tabor, S. & Richardson, C. C. A bacteriophage T7 RNA polymerase/promoter system for controlled exclusive expression of specific genes. *Proc. Natl. Acad. Sci. USA* **82**, 1074-1078 (1985).
6. Schwander, T., Schada von Borzyskowski, L., Burgener, S., Cortina, N. S. & Erb, T. J. A synthetic pathway for the fixation of carbon dioxide *in vitro*. *Science* **354**, 900-904 (2016).
7. Kitagawa, M. *et al.* Complete set of ORF clones of *Escherichia coli* ASKA library (A Complete Set of *E. coli* K-12 ORF Archive): Unique Resources for Biological Research. *DNA Res.* **12**, 291-299 (2005).
8. Meyer, M., Schweiger, P. & Deppenmeier, U. Succinic semialdehyde reductase Gox1801 from *Gluconobacter oxydans* in comparison to other succinic semialdehyde-reducing enzymes. *Appl. Microbiol. Biotechnol.* **99**, 3929-3939 (2015).
9. Kroeger, J. K., Zarzycki, J. & Fuchs, G. A spectrophotometric assay for measuring acetyl-coenzyme A carboxylase. *Anal. Biochem.* **411**, 100-105 (2011).
10. Fairhead, M. & Howarth, M. Site-specific biotinylation of purified proteins using BirA. *Methods Mol. Biol.* **1266**, 171-184 (2015).
11. Beneyton, T., Coldren, F., Baret, J.-C., Griffiths, A. D. & Taly, V. CotA laccase: high-throughput manipulation and analysis of recombinant enzyme libraries expressed in *E. coli* using droplet-based microfluidics. *Analyst* **139**, 3314-3323 (2014).
12. Beneyton, T. *et al.* Out-of-equilibrium microcompartments for the bottom-up integration of metabolic functions. *Nat. Commun.* **9**, 2391 (2018).
13. Beneyton, T. *et al.* High-throughput screening of filamentous fungi using nanoliter-range droplet-based microfluidics. *Sci. Rep.* **6**, 27223 (2016).
14. Fischlechner, M. *et al.* Evolution of enzyme catalysts caged in biomimetic gel-shell beads. *Nat. Chem.* **6**, 791-796 (2014).
15. Han, J., Gagnon, S., Eckle, T. & Borchers, C. H. Metabolomic analysis of key central carbon metabolism carboxylic acids as their 3-nitrophenylhydrazones by UPLC/ESI-MS. *Electrophoresis* **34**, 2891-2900 (2013).
16. Mordhorst, S., Siegrist, J., Müller, M., Richter, M. & Andexer, J. N. Catalytic Alkylation Using a Cyclic S-Adenosylmethionine Regeneration System. *Angew. Chem. Int. Ed.* **56**, 4037-4041 (2017).
17. Tran, T. H. *et al.* Structure and function of a single-chain, multi-domain long-chain acyl-CoA carboxylase. *Nature* **518**, 120-124 (2015).
18. Guan, X., Diez, T., Prasad, T. K., Nikolau, B. J. & Wurtele, E. S. Geranoyl-CoA carboxylase: a novel biotin-containing enzyme in plants. *Arch. Biochem. Biophys.* **362**, 12-21 (1999).
19. Kebeish, R. *et al.* Chloroplastic photorespiratory bypass increases photosynthesis and biomass production in *Arabidopsis thaliana*. *Nat. Biotechnol.* **25**, 593-599 (2007).

20. Maier, A. *et al.* Transgenic Introduction of a Glycolate Oxidative Cycle into *A. thaliana* Chloroplasts Leads to Growth Improvement. *Front. Plant Sci.* **3** (2012).
21. South, P. F., Cavanagh, A. P., Liu, H. W. & Ort, D. R. Synthetic glycolate metabolism pathways stimulate crop growth and productivity in the field. *Science* **363** (2019).
22. Shih, P. M., Zarzycki, J., Niyogi, K. K. & Kerfeld, C. A. Introduction of a synthetic CO<sub>2</sub>-fixing photorespiratory bypass into a cyanobacterium. *J. Biol. Chem.* **289**, 9493-9500 (2014).
23. Hansen, R. W. & Hayashi, J. A. Glycolate metabolism in *Escherichia coli*. *J. Bacteriol.* **83**, 679-687 (1962).
24. Krakow, G., Barkulis, S. S. & Hayashi, J. A. Glyoxylic acid carboligase: an enzyme present in glycolate-grown *Escherichia coli*. *J. Bacteriol.* **81**, 509 (1961).
25. Zelcbuch, L. *et al.* An *in vivo* metabolic approach for deciphering the product specificity of glycerate kinase proves that both *E. coli*'s glycerate kinases generate 2-phosphoglycerate. *PLoS ONE* **10**, e0122957 (2015).
26. Selmer, T., Willanzheimer, A. & Hetzel, M. Propionate CoA-transferase from *Clostridium propionicum*: Cloning of the gene and identification of glutamate 324 at the active site. *Eur. J. Biochem.* **269**, 372-380 (2002).
27. Vagstad, A. L., Bumpus, S. B., Belecki, K., Kelleher, N. L. & Townsend, C. A. Interrogation of global active site occupancy of a fungal iterative polyketide synthase reveals strategies for maintaining biosynthetic fidelity. *J. Am. Chem. Soc.* **134**, 6865-6877 (2012).
28. Nowak, C. *et al.* A water-forming NADH oxidase from *Lactobacillus pentosus* suitable for the regeneration of synthetic biomimetic cofactors. *Front. Microbiol.* **6**, 957 (2015).
29. Zarzycki, J., Sutter, M., Cortina, N. S., Erb, T. J. & Kerfeld, C. A. *In Vitro* Characterization and Concerted Function of Three Core Enzymes of a Glycyl Radical Enzyme - Associated Bacterial Microcompartment. *Sci. Rep.* **7**, 42757 (2017).
30. Lindenkamp, N., Schürmann, M. & Steinbüchel, A. A propionate CoA-transferase of *Ralstonia eutropha* H16 with broad substrate specificity catalyzing the CoA thioester formation of various carboxylic acids. *Appl. Microbiol. Biotechnol.* **97**, 7699-7709 (2013).
